1  
2  
3  
4  
5  
6  
7  
8  
9  
10  
11  
12  
13  
14  
15  
16  
17  
18  
19  
20  
21  
22  
23  
24  
25  
26  
27  
28  
29  
30  
31  
32  
33  
34

# Identifying neurophysiological features associated with anesthetic state in newborn mice and humans

Mattia Chini<sup>1</sup>, Sabine Gretenkord<sup>1</sup>, Johanna K. Kostka<sup>1</sup>,  
Jastyn A. Pöpplau<sup>1</sup>, Laura Cornelissen<sup>2,3</sup>, Charles B. Berde<sup>2,3</sup>,  
Ileana L. Hanganu-Opatz<sup>1,\*</sup> & Sebastian H. Bitzenhofer<sup>1,\*</sup>

<sup>1</sup> Developmental Neurophysiology, Institute of Neuroanatomy, University Medical Center Hamburg-Eppendorf, Hamburg, Germany

<sup>2</sup> Department of Anesthesiology, Critical Care and Pain Medicine, Boston Children's Hospital, Boston, Massachusetts

<sup>3</sup> Department of Anaesthesia, Harvard Medical School, Boston, Massachusetts

\* Equal contribution

Corresponding authors: Sebastian Bitzenhofer  
sebbitz@zmnh.uni-hamburg.de

Ileana L. Hanganu-Opatz  
hangop@zmnh.uni-hamburg.de

Figures: 4

Words: Abstract 135, Introduction 548, Results 1912, Discussion 760, Materials and methods 1899

Supplementary Material: Supplementary figures S1-S7, Supplementary table S1-S2

**Running title:** Anesthesia and network dynamics during development

## One Sentence Summary

Machine learning reveals consistent features of anesthetic states assessed by intracranial recordings in newborn mice and multichannel EEG in human neonates and infants.

35 **Abstract**

36 Monitoring the hypnotic component of anesthesia during surgeries is critical to prevent  
37 intraoperative awareness and reduce adverse side effects. For this purpose,  
38 electroencephalographic methods complementing measures of autonomic functions and  
39 behavioral responses are in use in clinical practice. However, in human neonates and  
40 infants existing methods may be unreliable and the correlation between brain activity  
41 and anesthetic depth is still poorly understood. Here, we characterize the effects of  
42 different anesthetics on activity of several brain areas in neonatal mice and develop  
43 machine learning approaches to identify electrophysiological features predicting inspired  
44 or end-tidal anesthetic concentration as a proxy for anesthetic depth. We show that  
45 similar features from electroencephalographic recordings can be applied to predict  
46 anesthetic concentration in neonatal mice, and human neonates and infants. These  
47 results might support a novel strategy to monitor anesthetic depth in human newborns.

48

## 49 **Introduction**

50           Reliable monitoring of anesthesia depth is critical during surgery. It allows for loss  
51 of consciousness, analgesia and immobility without incurring the risk of side effects and  
52 complications due to anesthetic misdosing. Typically used measures to monitor  
53 anesthesia depth are inspired and end-tidal anesthetic concentrations as well as  
54 physiologic parameters, including respiratory rate and depth (in the absence of  
55 neuromuscular blockade or controlled ventilation), heart rate, blood pressure, and  
56 responses to noxious stimuli (1). These measures all respond to spinal and brainstem  
57 reflexes and are not specific for arousal or cortical responses to noxious events.

58           Anesthesia-induced changes in brain activity can be measured with  
59 electroencephalographic (EEG) recordings. Specific algorithms have been developed to  
60 predict anesthesia depth in adults (2-4). The most commonly used of such methods, the  
61 Bispectral Index, has been shown to significantly reduce intraoperative awareness,  
62 amount of anesthetic used, recovery time and post-anesthesia care unit stay in a recent  
63 Cochrane meta-analysis (5), but see (6, 7). However, evidence of similar benefits in  
64 infants and younger children is sparse, as recently shown (8-10). EEG in anesthetized  
65 infants changes dramatically depending on postnatal age (8, 11-14).

66           EEG recordings mainly monitor neocortical activity. Converging evidence from  
67 animal and human studies has shown that most anesthetics slow  
68 electroencephalographic oscillations (15-17). While power at high frequency oscillations  
69 is reduced (>40 Hz), power at slower frequencies (<15 Hz) is enhanced (15). The  
70 computations underlying proprietary indexes such as the Bispectral index or Narcotrend  
71 are thought to take advantage of these phenomena (18). However, in preterm and term  
72 neonates for the first weeks of life, EEG during sleep-wake cycles is weakly correlated

73 with behavioral states and shows characteristic bursts or spontaneous activity transients  
74 (19, 20). Anesthesia-induced theta and alpha oscillations have been reported to emerge  
75 around 3-4 months of age, albeit with less frontal predominance than in older children  
76 and adults (8, 10). Moreover, high concentrations/doses of anesthetics have been  
77 reported to depress brain activity and enhance signal discontinuity in both human and  
78 rodent neonates (9, 21, 22). However, to our knowledge, a comprehensive algorithmic  
79 approach identifying electroencephalographic parameters that robustly correlate with  
80 anesthetic depth during early postnatal development is still lacking.

81 Here, we developed a novel strategy to model anesthesia depth by using  
82 common electrophysiological features that correlate with inhaled anesthetic  
83 concentrations during early development in age-matched mice and humans. We  
84 performed intracranial electrophysiological recordings to study the temporal and dose-  
85 dependent dynamics of brain activity in neonatal mice (postnatal day (P) 8-10) during  
86 bolus urethane administration, and during dose-titrated isoflurane general anesthesia,  
87 respectively. Dominant local field potential (LFP) features of anesthetic state were  
88 identified and used to develop a machine-learning algorithm that distinguishes non-  
89 anesthetized from deeply anesthetized states, and predicts anesthetic concentration as  
90 a proxy for anesthetic depth. Using a similar approach, we used multielectrode EEG  
91 recordings to study the dose-dependent dynamics of brain activity in a secondary  
92 analysis of a combined new and previously reported data set (10) of human infants 0-6  
93 months of age during induction, maintenance and emergence from general anesthesia  
94 (sevoflurane, isoflurane, or desflurane) administered for routine surgical care. Dominant  
95 EEG features of anesthetic state were identified and used to develop a machine-learning

96 algorithm to predict end-tidal volume anesthetic concentration (an indirect measure of  
97 anesthetic concentration in the brain, and anesthetic depth).

98

## 99 **Results**

### 100 ***Anesthesia affects the occurrence but not the spectral and temporal structure of*** 101 ***oscillatory events in neonatal mice***

102 We monitored the impact of anesthesia on immature brain activity in several cortical  
103 areas (prefrontal cortex (PFC), hippocampus (HP), and lateral entorhinal cortex (LEC))  
104 as well as in a sensory area (olfactory bulb (OB)). For this, multi-site extracellular  
105 recordings of LFP and multi-unit activity (MUA) were performed from P8-10 mice before  
106 and for 45 minutes after induction of anesthesia by intraperitoneal urethane injection  
107 (Fig. 1A), an anesthetic commonly used in rodents (23, 24).

108 The recorded network activity had a highly fragmented structure (defined as  
109 discontinuous activity) in all investigated areas (PFC, HP, LEC and OB). The full signal  
110 (i.e. entire LFP trace) consisted of transient episodes of oscillatory discharges with  
111 mixed frequencies (from here referred to as ‘active periods’), alternating with periods of  
112 relative electrical silence and suppressed activity (from here referred to as ‘silent  
113 periods’) (Fig. 1A) (23, 25-28). The prevalence of active periods decreased rapidly and  
114 robustly over time in all investigated brain areas upon urethane injection (Fig. 1B). The  
115 most prominent reduction was observed 5 to 15 minutes after urethane injection. A  
116 partial recovery towards baseline levels during the following 30 minutes was detected in  
117 cortical areas, and to a lesser extent in OB (Fig. 1B). The temporal sequence of events  
118 likely reflects the pharmacokinetics of urethane and is line with the previously reported  
119 long-lasting effects of urethane anesthesia (29).

120           The anesthesia-induced reduced occurrence of active periods was reflected in a  
121 broadband (1-100 Hz) decrease in oscillatory power shown as modulation index (MI)  
122 defined as  $(\text{power}_{\text{post}} - \text{power}_{\text{pre}}) / (\text{power}_{\text{post}} + \text{power}_{\text{pre}})$ . In contrast, power spectra during  
123 active periods were largely unaffected (Fig. 1C). Spectral properties of full signal and  
124 active periods were quantified for delta (2-4Hz), theta-alpha (4-12 Hz), beta (12-30 Hz)  
125 and gamma (30-100 Hz) frequency bands for the first 15 minutes post urethane  
126 administration. In contrast to the significant reduction of full signal power in all frequency  
127 bands, the power during active periods was only marginally affected by anesthesia (Fig.  
128 1D). Thus, urethane anesthesia affected network activity in the immature rodent brain  
129 predominantly by decreasing the amount of active periods without perturbing the  
130 frequency structure of active periods. This is in stark contrast with the well-characterized  
131 switch from a low-amplitude high-frequency regime to a high-amplitude low-frequency  
132 regime of electrical activity that has been reported for the adult rodent and human brain  
133 (17, 30).

134           Anesthesia was shown to induce alterations of long-range network interactions in  
135 adult rodents (31) and humans (32-34). We examined whether similar alterations are  
136 present in the immature mouse brain. Simultaneous recordings of HP and PFC, as well  
137 as OB and LEC were analyzed to assess the effects of anesthesia on long-range  
138 functional coupling. We previously showed that at the end of the first postnatal week  
139 hippocampal theta bursts drive the oscillatory entrainment of local circuits in the PFC,  
140 whereas discontinuous activity in OB controls the network activity in LEC (26, 27, 35).  
141 Urethane did not modify these interactions. The synchrony within networks quantified by  
142 HP-PFC and OB-LEC coherence was similar during baseline (no urethane anesthesia)

143 and in the presence of urethane (Fig. S1A). These data indicate that the core features of  
144 long-range functional coupling are retained under anesthesia in neonatal mice.

145 Anesthesia modified neuronal firing in all investigated areas. Firing rates in PFC,  
146 HP, LEC and OB decreased after urethane injection and only partially recovered during  
147 the following 45 min (Fig. 1E). However, firing rates during active periods were only  
148 marginally affected. To examine whether the timing of neuronal firing to the phase of  
149 oscillatory activity was altered by anesthesia, we calculated pairwise phase consistency  
150 (PPC), a firing rate-independent measure of spike-LFP phase locking (36). All four brain  
151 regions showed similar frequency-resolved phase locking profiles before and after  
152 urethane injection (Fig. S1B,C).

153 Anesthetics have been shown to alter the excitation/inhibition balance in the adult  
154 brain through their action on specific ion channels involved in synaptic transmission (37).  
155 Such alteration is usually monitored by changes in the  $1/f$  slope of power spectral  
156 density. Further, signal complexity and information content measured by sample entropy  
157 have been correlated with behavioral states of adults, such as consciousness,  
158 sleep/wake states and anesthesia (38, 39). For neonatal mice, we observed similar  
159 values of  $1/f$  slope and sample entropy before and during urethane anesthesia (Fig.  
160 S1D-F), suggesting that urethane does not perturb cortical excitation/inhibition balance  
161 and signal complexity at this early age. The findings provide additional evidence to the  
162 hypothesis that anesthesia has unique effects on the immature brain.

163 To add additional evidence for this hypothesis, we extended the time window of  
164 investigation and performed extracellular recordings from the PFC of juvenile mice (P24-  
165 39). In contrast to the frequency-unspecific reduction of active periods in neonates,  
166 urethane anesthesia increased the oscillatory power in the delta frequency band and

167 suppressed power in beta and gamma frequency bands (Fig. S2), confirming the  
168 anesthetic effects in the adult brain (15-17).

169 Taken together, these results indicate that urethane anesthesia dampened  
170 neonatal brain activity mainly by augmenting the discontinuity of network activity, i.e.  
171 reducing the proportion of time the brain spent in active periods. However, the active  
172 periods were largely unaffected in their temporal structure and firing dynamics. In  
173 contrast, urethane anesthesia in older mice led to frequency-specific changes. Thus,  
174 urethane anesthesia differently impacts neonatal and adult brain activity in mice.

175

### 176 ***Suppression of active periods predicts anesthetic concentration in neonatal mice***

177 To test whether the effects of urethane on neonatal brain activity generalize to other  
178 anesthetics, we performed LFP and MUA recordings from HP and PFC of P8-10 mice at  
179 increasing doses of isoflurane-induced anesthesia (0, 1, 2 and 3%; 15 min per  
180 concentration) (Fig. 2A). Isoflurane reduced the incidence of active periods in a dose-  
181 dependent manner (Fig. 2B). Accordingly, the broadband reduction of LFP power was  
182 also dependent on isoflurane concentration (Fig. 2C,D). Power spectra of active periods  
183 remained largely unaffected in the presence of isoflurane, similarly to the urethane  
184 effects (Fig. 2C,D). MUA rates during active periods in PFC and HP were hardly  
185 modified in the presence of isoflurane, yet the overall firing decreased corresponding to  
186 the reduced occurrence of active periods (Fig. 2E). Together, these findings identify the  
187 suppression of active periods as the main effect of bolus urethane injection and  
188 isoflurane anesthesia in the neonatal mouse brain.

189 The development-specific response of the immature brain to anesthesia might  
190 represent the main obstacle when trying to predict anesthesia depth in infants using



191 algorithms based on the mature brain activity of adults. Therefore, we next aimed to use  
192 electrophysiological properties specific for anesthetized neonatal mice to predict the  
193 concentration of administered isoflurane. We used support vector regression (Fig. S3),  
194 with the following input features: median amplitude of broadband LFP, percent of time  
195 spent in active periods, and spectral power from 1 to 100 Hz in 10 Hz bins for both  
196 hippocampal and prefrontal activity. An additional feature was the output of a support  
197 vector classifier that received the same features as for the support vector regression,  
198 and that was designed to predict whether the animal was under anesthesia or not. The  
199 algorithm accurately predicted anesthesia depth across all levels of isoflurane  
200 concentration (Fig. 2F,G). Estimation of information content of the different features  
201 identified the median amplitude of broadband LFP as the most informative feature (Fig.  
202 S4A). As the power of active periods was only marginally affected by anesthesia, this  
203 feature mainly mirrors the suppression of active periods. Interestingly, the algorithm was  
204 also able to distinguish non-anesthetized from anesthetized recordings from neonatal  
205 mice under urethane, even though it had not been exposed to this dataset during  
206 training (Fig. S4B).

207 Thus, features of electrophysiological activity that capture the particularities of  
208 immature neuronal networks can predict anesthetic concentration in neonatal mice. The  
209 generalization of the classifier to a different anesthetic indicates that it can identify  
210 general anesthesia-related features of brain activity in neonatal mice.

211  
212 ***Frequency-unspecific suppression of activity in anesthetized human neonates***  
213 ***and young infants***

214 To test if human neonates and infants, similarly to mice, respond to anesthesia with a  
215 broadband decrease of periods of oscillatory activity, we examined EEG recordings from  
216 humans aged 0-6 months postnatal age, who received general anesthesia with volatile  
217 anesthetics (sevoflurane 32 subjects, isoflurane 2 subjects, desflurane 1 subject) for  
218 surgery (Tab. S1).

219 In neonatal mice, the median LFP amplitude of broadband activity was identified  
220 as the most informative feature to predict anesthetic depth. We therefore applied the  
221 same data analysis approach to human EEG data (Fig. S5). We found the median  
222 amplitude of broadband EEG activity (averaged across all recording electrodes across  
223 the scalp) was negatively correlated with endtidal anesthetic concentration  
224 (etAnesthetic) in human neonates from birth until 2 months postnatal age (Fig. 3A,B).  
225 For older human infants, the correlation of the median EEG amplitude with the  
226 anesthetic concentration switched to a positive correlation, in agreement with adult  
227 human data (40). This relationship was even stronger using expected birth age,  
228 corrected for conceptional age (Fig. S6A). This switch from negative to positive  
229 correlation was also visible in the normalized median EEG amplitude when averaged for  
230 age-grouped babies (0-2, 2-4, 4-6 months) (Fig. 3C).

231 Quantification of median EEG amplitude across frequencies revealed a  
232 broadband suppression of EEG activity in human neonates of 0-2 months (Fig. 3D). In  
233 contrast, the relationship between activity amplitude and etAnesthetic indicated  
234 frequency-specificity in human infants of 2-4 and 4-6 months, as previously reported (9).  
235 Frontal activity has been shown to be particularly sensitive to age-varying anesthesia-  
236 related effects in human neonates (8). Analysis of only frontal electrodes (Fp1, Fp2, F3,

237 F4, F7, F8, Fpz) showed the same age-dependent anesthesia-induced changes as  
238 analysis of full scalp electrodes (Fig. S6B-D).

239 Thus, analogous to what we found in neonatal mice, general anesthesia in  
240 human infants younger than 2 months suppressed neuronal population activity, as  
241 reported previously (8), while at older age anesthesia induced frequency-specific effects.

242  
243 ***A model to predict end-tidal volume of sevoflurane anesthesia in human neonates***  
244 ***and infants***

245 The correlation of EEG activity with etAnesthetic as well as the similar effects of  
246 anesthesia in neonatal mice and in humans from birth to 2 months old, suggests that  
247 anesthetic depth in babies might be predicted using similar features to those used in  
248 neonatal mice. To test this, we used a machine-learning algorithm with a similar  
249 architecture as the one we developed for neonatal mice (Fig. S3). The algorithm was  
250 modified to account for the developmental switch from broadband suppression to  
251 frequency-specific modulation by training three different regressors using 2 and 4  
252 months as cut-offs. All regressors received the same input features (see Methods and  
253 Fig. S5). Features derived from EEG activity were able to predict etAnesthetic with high  
254 accuracy for all age groups (0-2 months  $R^2=0.806$ , 2-4 months  $R^2=0.688$ , 4-6 months  
255  $R^2=0.787$ ) (Fig. 4A-C). In line with the frequency-specific alterations observed only in the  
256 older age groups, frequency-related features were rated more important for prediction of  
257 anesthesia depth in infants of 2-4 and 4-6 months than in neonates of 0-2 months (Fig.  
258 S7A-C). Predicting anesthesia depth for all ages with a single classifier considering age  
259 as an input feature performed with high accuracy (0-6 months  $R^2=0.689$ ) (Fig. 4D, S7D).  
260 This result confirms the age-varying effects of anesthesia on the brain and stresses the

261 importance of considering age when developing algorithms aiming to assess anesthetic  
262 depth.

263 Thus, mouse and human neonates show similar changes in network activity in  
264 response to anesthesia. These results highlight how neurophysiological activity could be  
265 beneficial for future attempts at predicting anesthetic depth in clinical settings.

266

## 267 **Discussion**

268 Monitoring brain function during anesthesia is desirable to avoid intraoperative  
269 awareness and side effects resulting from unnecessarily high doses of anesthetics.  
270 Since consciousness is an elusive concept and cannot be directly measured, EEG  
271 features have been used to guide anesthesia delivery during human surgery. Monitoring  
272 methods developed for adults perform poorly in human neonates and infants, particularly  
273 during the first months of life (11-13, 41). Age-specific effects of anesthetics on  
274 immature brain activity are considered the main reason for such poor performance.  
275 Implementation of neonate- and infant-specific anesthesia monitors requires elucidation  
276 of distinct anesthesia-induced EEG features during early development. We took  
277 advantage of a translational approach to address this open question. We first carried out  
278 an in depth investigation of anesthesia effects on brain activity in neonatal mice, and  
279 then applied this knowledge to develop features that would correlate with anesthetic  
280 concentration in human neonates.

281 In contrast to the continuous EEG signal observed in adults, neonatal EEG  
282 around birth is characterized by a highly discontinuous and fragmented temporal  
283 organization, with bursts of cerebral activity (active periods) alternating with interburst  
284 intervals lacking activity (silent periods) (42-48). Neonatal mice show a similar

285 discontinuous organization of cortical activity (23, 25, 26). In accordance with the similar  
286 organization of early activity patterns in age-matched mouse pups and human infants,  
287 we found comparable effects of anesthesia on LFP and EEG signals, respectively.

288 It is well established that in the adult rodent and human brain most anesthetics  
289 favor slow oscillations at the expense of faster ones, thereby slowing the  
290 electroencephalographic rhythm (15-17). This principle is thought to underlie most  
291 algorithms that are clinically used to predict anesthesia depth (13). Indeed, such  
292 algorithms perform poorly with anesthetics, such as ketamine, that do not share this  
293 mechanism of action (49). In line with previous studies (50, 51), we report that both  
294 urethane and isoflurane anesthesia affect brain activity in a different way in neonatal  
295 mice. Instead of favoring slow oscillations at the expense of faster ones, anesthesia in  
296 neonatal mice broadly suppresses activity in a frequency-unspecific manner. The  
297 dampening of cortical activity for human infants of 0-2 months suggests a development  
298 specific effect of anesthesia on immature brain activity that translates between mice and  
299 humans.

300 In rodents, the switch from activity suppression to frequency-specific modulation  
301 of neuronal activity by anesthesia has been reported to occur around P12 (50). This  
302 coincides with the emergence of slow oscillations during sleep, suggested to depend on  
303 the maturation of thalamocortical networks (50, 52). Consistent with our previous studies  
304 evaluating EEG properties of this data set, we found that theta and alpha oscillatory  
305 activity under anesthesia emerges in humans at around 4 months postnatal age (8-10).  
306 Future studies with an increased age range in mice and humans, including data of  
307 human infants studied at preterm, and children in older than 6 months of age, may

308 deepen the understanding of anesthetic effects on brain activity throughout  
309 development.

310         The anesthetics evaluated across species in this study were comparable but not  
311 identical in terms of mechanism of action. Moreover, anesthetic management practices  
312 used in mice were simplified compared to commonly-used anesthetic practices in the  
313 clinic. Multimodal anesthesia requires the use of low-dose anesthetics in combination  
314 with analgesic and neuromuscular blocking agents to provide optimal anesthesia and  
315 reduce side effect. These agents act on different drug targets in the nervous system and  
316 may have subtle but different effects on brain oscillatory activity (53).

317         In adult human volunteers, the correlation with anesthetic depth and EEG  
318 parameters can be performed using verbal reports to establish a threshold for  
319 unconsciousness (15). However, in non-verbal populations such as human infants, one  
320 must rely on indirect behavioral measures which are more readily performed on  
321 emergence rather than induction and incision (54). Future investigations need to include  
322 surgical incision and other stimuli into the mouse models to understand with greater  
323 granularity the anesthetic titration around the minimal concentrations required to  
324 suppress movement, autonomic, and cortical responses to noxious stimuli.

325         In summary, we report that the suppression of brain activity in mouse and human  
326 neonates correlates with anesthetic concentration. The detailed understanding of  
327 anesthesia effects on network activity in mice allowed us to identify features and develop  
328 a machine-learning algorithm that is able to predict anesthetic concentration from EEG  
329 recordings in human neonates. We propose that, after appropriate training, an algorithm  
330 based on what we introduce here could learn to associate specific EEG effects with  
331 certain anesthetic doses. Eventual mismatches between administered and predicted

332 anesthetic dose would then identify patients that are particularly sensitive/insensitive to  
333 an anesthetic, thus helping the anesthetist in administering appropriate levels of  
334 anesthetics. By these means, the risk of adverse neurodevelopmental outcome might be  
335 mitigated.

336

## 337 **Materials and methods**

### 338 *Animals*

339 All experiments were performed in compliance with the German laws and the guidelines  
340 of the European Community for the use of animals in research and were approved by  
341 the local ethical committee (G132/12, G17/015, N18/015). Experiments were carried out  
342 on C57Bl/6J mice of both sexes. Timed-pregnant mice from the animal facility of the  
343 University Medical Center Hamburg-Eppendorf were housed individually at a 12 h  
344 light/12 h dark cycle, with ad libitum access to water and food. Day of birth was  
345 considered P0.

### 346 *In vivo electrophysiology in neonatal mice*

347 Multisite extracellular recordings were performed in the PFC and HP, or LEC and OB of  
348 P8–10 mice. Pups were on a heating blanket during the entire procedure. Under  
349 isoflurane anesthesia (induction: 5%; maintenance: 2.5%), craniotomies were performed  
350 above PFC (0.5 mm anterior to bregma, 0.1-0.5 mm right to bregma) and HP (3.5 mm  
351 posterior to bregma, 3.5 mm right to bregma), or LEC (0 mm anterior to lambda, 6.5 mm  
352 right to lambda) and OB (0.5-0.8 mm anterior from the frontonasal suture, 0.5 mm right  
353 from internasal suture). Pups were head-fixed into a stereotaxic apparatus using two  
354 plastic bars mounted on the nasal and occipital bones with dental cement. Multisite  
355 electrodes (NeuroNexus, MI, USA) were inserted into PFC (four-shank, A4x4 recording

356 sites, 100  $\mu\text{m}$  spacing, 2.0 mm deep) and HP (one-shank, A1x16 recording sites, 50  $\mu\text{m}$   
357 spacing, 1.6 mm deep, 20° angle from the vertical plane), or LEC (one-shank, A1x16  
358 recording sites, 100  $\mu\text{m}$  spacing, 2 mm deep, 10° angle from the vertical plane) and OB  
359 (one-shank, A1x16 recording sites, 50  $\mu\text{m}$  spacing, 1.4-1.8 mm deep). A silver wire was  
360 inserted into the cerebellum and served as ground and reference electrode. Pups were  
361 allowed to recover for 30 min prior to recordings. Extracellular signals were band-pass  
362 filtered (0.1-9,000 Hz) and digitized (32 kHz) with a multichannel extracellular amplifier  
363 (Digital Lynx SX; Neuralynx, Bozeman, MO, USA).

364 *In vivo electrophysiology in juvenile mice*

365 Multisite extracellular recordings were performed in the PFC of P24–39 mice. Under  
366 isoflurane anesthesia (induction: 5%; maintenance: 2.5%), a metal head-post (Luigs and  
367 Neumann) was attached to the skull with dental cement and 2-mm craniotomies were  
368 performed above PFC (0.5-2.0 mm anterior to bregma, 0.1-0.5 mm right to bregma) and  
369 protected by a customized synthetic window. A silver wire was implanted in the  
370 cerebellum as ground and reference electrode. Surgery was performed at least five days  
371 before recordings. After recovery mice were trained to run on a custom-made spinning-  
372 disc. For recordings craniotomies were uncovered and multisite electrodes  
373 (NeuroNexus, MI, USA) were inserted into PFC (one-shank, A1x16 recording sites, 50  
374  $\mu\text{m}$  spacing, 2.0 mm deep). Extracellular signals were band-pass filtered (0.1-9,000 Hz)  
375 and digitized (32 kHz) with a multichannel extracellular amplifier (Digital Lynx SX;  
376 Neuralynx, Bozeman, MO, USA).

377 *Recordings under urethane*



378 Activity was recorded for 15 min without anesthesia before intraperitoneally injecting  
379 urethane (1 mg/g body weight; Sigma-Aldrich, MO, USA). Activity was recorded for  
380 further 45 min. Animals were transcardially perfused after recordings, brains were  
381 sectioned coronally, and wide field images were acquired to verify recording electrode  
382 positions.

### 383 *Recordings under isoflurane*

384 Mouth piece of an isoflurane evaporator (Harvard apparatus, MA, USA) was placed in  
385 front of the pups in the recording setup until animals accustomed to it. Activity was  
386 recorded for 15 min 0% isoflurane, but with the evaporator running (1.4 l/min).  
387 Afterwards, isoflurane was added to the airflow and increased every 15 min (1, 2, 3 %).  
388 Animals were transcardially perfused after recordings, brains were sectioned coronally,  
389 and wide field images were acquired to verify recording electrode positions.

### 390 *Electroencephalographic recordings in human neonates and young infants*

391 Neonates and infants who were scheduled for an elective surgical procedure were  
392 recruited from the pre-operative clinic at Boston Children's Hospital from 12/2012 to  
393 08/2018 (under Institutional Review Board P-3544, with written informed consent  
394 obtained from parents/legal guardians). Subjects required surgery below the neck, were  
395 clinically stable on the day of study and American Society of Anesthesiologists' physical  
396 status I or II. Exclusion criteria were born with congenital malformations or other genetic  
397 conditions thought to influence brain development, diagnosed with a neurological or  
398 cardiovascular disorder, or born at <32 weeks post-menstrual age. Datasets from  
399 previously published work (n=25) (10) and new subjects (n=10) were included in the  
400 analysis. Data are presented from 35 subjects aged 0-6 months.

401 *Anesthetic management.* Each patient received anesthesia induced with sevoflurane (32  
402 subjects), isoflurane (2 subjects) or desflurane (1 subject) alone, or a combination of one  
403 of the previous and nitrous oxide. Epochs used for analysis were comprised of  
404 sevoflurane, isoflurane or desflurane administration with air and oxygen, titrated to  
405 clinical signs; end-tidal anesthetic concentration was adjusted per the anesthetist's  
406 impression of clinical need, not a pre-set end-tidal anesthetic concentration.

407 *EEG recording.* EEG data were acquired using an EEG cap (WaveGuard EEG cap,  
408 Advanced NeuroTechnology, Netherlands). 33- or 41-recording electrodes were  
409 positioned per the modified international 10/20 electrode placement system. Reference  
410 and ground electrodes were located at Fz and AFz respectively. EEG activity from 0.1-  
411 500 Hz was recorded with an Xtek EEG recording system (EMU40EX, Natus Medical  
412 Inc., Canada). Signals were digitized at a sampling rate of 1024Hz and a resolution of  
413 16-bit.

414 *Clinical data collection.* Demographics and clinical information were collected from the  
415 electronic medical records and from the in-house Anesthesia Information Management  
416 System (AIMS) (Tab. S1). End-tidal sevoflurane, oxygen, and nitrous oxide  
417 concentrations were downloaded from the anesthetic monitoring device (Dräger Apollo,  
418 Dräger Medical Inc., PA, USA) to a recording computer in real-time using ixTrend  
419 software (ixcellence, Germany). Signals were recorded at a 1 Hz sampling rate.

#### 420 *Data analysis*

421 In vivo data were analyzed with custom-written algorithms in the Matlab environment.  
422 Data were processed as following: band-pass filtered (500–5,000 Hz) to analyze MUA  
423 and band-pass filtered (2-100 Hz) using a third-order Butterworth filter before

424 downsampling to analyze LFP. Filtering procedures were performed in a phase  
425 preserving manner.

426 *Multi-unit activity.* MUA was detected as the peak of negative deflections exceeding five  
427 times the standard deviation of the filtered signal and having a prominence larger than  
428 half the peak itself. Firing rates were computed by dividing the total number of spikes by  
429 the duration of the analyzed time window.

430 *Detection of oscillatory activity.* Discontinuous active periods were detected with a  
431 modified version of a previously developed algorithm for unsupervised analysis of  
432 neonatal oscillations (55). Briefly, deflections of the root mean square of band-pass  
433 filtered signals (1–100 Hz) exceeding a variance-depending threshold were considered  
434 as network oscillations. The threshold was determined by a Gaussian fit to the values  
435 ranging from 0 to the global maximum of the root-mean-square histogram. If two  
436 oscillations occurred within 200 ms of each other they were considered as one. Only  
437 oscillations lasting >1 s were included, and their occurrence, duration and amplitude  
438 were computed.

439 *Power spectral density.* For power spectral density analysis, 1 s-long windows of full  
440 signal or network oscillations were concatenated and the power was calculated using  
441 Welch's method with non-overlapping windows.

442 *Imaginary coherence.* The imaginary part of coherence, which is insensitive to volume-  
443 conduction-based effects (56), was calculated by taking the absolute value of the  
444 imaginary component of the normalized cross-spectrum:

445 *Pairwise phase consistency.* Pairwise phase consistency was computed as previously  
446 described (36). Briefly, the phase in the band of interest was extracted using Hilbert

447 transform and the mean of the cosine of the absolute angular distance among all pairs  
448 of phases was calculated.

449 *1/f slope.*  $1/f$  slope was computed as previously described (19). We used robust linear  
450 regression (MATLAB function *robustfit*) to find the best fit over 20-40 Hz frequency range  
451 of the power spectral density, in one minute bins.

452 *Sample entropy.* Sample Entropy was computed using the SampEn function (MATLAB  
453 File Exchange) in 1.5 seconds windows and in 2 Hz frequency bins. Tolerance was set  
454 to  $0.2 * \text{std}(\text{signal})$ , and tau to 1.

455 *EEG data analysis.* EEG signal was visually inspected to detect and reject channels with  
456 low signal to noise ratio, and re-referenced to a common average reference. The signal  
457 was automatically scored in five seconds epochs, and channels in which signal was  
458 significantly contaminated by artifacts (patient handling, surgical electrocautery etc.)  
459 were discarded. Epochs were rejected if signal was saturated due to electrocautery,  
460 signal exceeded  $150\mu\text{V}$ , or the median signal across all EEG channels exceeds  $30\mu\text{V}$   
461 (Fig. S5). Minutes containing more than 10s of contaminated signal were removed from  
462 further analysis. On average  $14 \pm 9\%$  (median  $\pm$  median absolute deviation) of the  
463 signal was discarded. To compute EEG amplitude, we smoothed the absolute value of  
464 the signal, using a moving average filter with a window of 1024 points (1 second). If  
465 more than one volatile anesthetic was used, we retained only epochs in which the main  
466 anesthetic was used in isolation. Subjects with epidural anesthesia halfway through the  
467 surgery ( $n=2$  subjects), or with less than 20 minutes of artifact-free signal ( $n=5$  subjects)  
468 were excluded from further analysis.

469 *Feature engineering.* Features to predict anesthetic concentration in neonatal mice were  
470 calculated in one minute bins. LFP power in the 1-100 Hz range in 10 Hz bins, the  
471 percentage of active periods, median length and number of oscillations, median and  
472 maximum signal amplitude were computed. All features were computed for both PFC  
473 and HP, and were normalized to their median value in the non-anesthetized 15 minutes  
474 of recordings. Features to predict anesthetic concentration in human infants were also  
475 calculated in one minute bins. The median amplitude of the smoothed EEG signal, and  
476 the percentage of the EEG envelope that fell into each amplitude quartile was computed.  
477 Amplitude quartiles were computed on the entire EEG trace, averaged over channels.  
478 All features were calculated for unfiltered signal, and in the 1-50 Hz range in 5 Hz bins,  
479 averaged over channels. Features were normalized to their median value in the non-  
480 anesthetized portion of the recording, or lowest anesthetic concentration, if no artifact-  
481 free minute was available.

482 *Regressors.* Machine-learning analyses were performed using Python (Python Software  
483 Foundation, NH, USA) in the Spyder (Pierre Raybaut, The Spyder Development Team)  
484 development environment. Model training and performance evaluation were carried out  
485 using the scikit-learn toolbox. The set was iteratively ( $n=100$ ) divided in a training (2/3 of  
486 the set) and a cross-validation (1/3) set. Hyper-parameter of the model were tuned on  
487 the training set, which was further split using the standard 3-fold cross-validation split  
488 implemented by the function “GridSearchCV”, to which a “pipeline” object was passed.  
489 The “pipeline” object was built using the “Pipeline” function, and concatenating quantile  
490 transformation of the input features (“Quantile Transformer”, tuning the number of  
491 quantiles), feature selection (“Select Percentile”, using mutual information and tuning the  
492 percentage of features to select) and Radial Basis Function (RBF) kernel support-vector

493 classification/regression (tuning the regularization parameters C and epsilon (regression  
494 only), and the kernel coefficient gamma). The classifier input was fed to the regressor as  
495 an additional feature. Performance assessment was then computed on the cross-  
496 validation set. Regressor decision space was reduced and plotted with t-sne. The  
497 decision space was approximated by imposing a Voronoi tessellation on the 2d plot,  
498 using k-nearest regression on the t-sne coordinates (57).

499 *Statistics* Statistical analyses were performed using R Statistical Software (Foundation  
500 for Statistical Computing, Austria). Data were tested for significant differences (\* $P < 0.05$ ,  
501 \*\* $P < 0.01$  and \*\*\* $P < 0.001$ ) using non-parametric one- and two-way repeated-measures  
502 ANOVA (ARTool R package) with Bonferroni corrected post hoc analysis (emmeans R  
503 package). Correlations were computed using Spearman's rank correlation coefficient  
504 ( $\rho$ ). No statistical measures were used to estimate sample size since effect size was  
505 unknown. For main experimental results, more information about tests used, values and  
506 parameters are provided in the supplementary material (Tab. S2).

507

508 **References**

- 509 1. Surgery: Basic science and clinical evidence. *Archives of Surgery* **136**, 1208 (2001).
- 510 2. L. S. Prichep *et al.*, The Patient State Index as an indicator of the level of hypnosis under general  
511 anaesthesia. *British journal of anaesthesia* **92**, 393 (Mar, 2004).
- 512 3. M. Kreuzer, EEG Based Monitoring of General Anesthesia: Taking the Next Steps. *Frontiers in*  
513 *computational neuroscience* **11**, 56 (2017).
- 514 4. P. S. Glass *et al.*, Bispectral analysis measures sedation and memory effects of propofol,  
515 midazolam, isoflurane, and alfentanil in healthy volunteers. *Anesthesiology* **86**, 836 (Apr, 1997).
- 516 5. Y. Punjasawadwong, A. Phongchiewboon, N. Bunchungmongkol, Bispectral index for improving  
517 anaesthetic delivery and postoperative recovery. *The Cochrane database of systematic reviews*,  
518 CD003843 (Jun 17, 2014).
- 519 6. C. J. Kalkman, L. M. Peelen, K. G. Moons, Pick up the pieces: depth of anesthesia and long-term  
520 mortality. *Anesthesiology* **114**, 485 (Mar, 2011).
- 521 7. Z. Hajat, N. Ahmad, J. Andrzejowski, The role and limitations of EEG-based depth of anaesthesia  
522 monitoring in theatres and intensive care. *Anaesthesia* **72 Suppl 1**, 38 (Jan, 2017).
- 523 8. L. Cornelissen, S. E. Kim, P. L. Purdon, E. N. Brown, C. B. Berde, Age-dependent  
524 electroencephalogram (EEG) patterns during sevoflurane general anesthesia in infants. *eLife* **4**,  
525 e06513 (Jun 23, 2015).
- 526 9. L. Cornelissen *et al.*, Electroencephalographic discontinuity during sevoflurane anesthesia in  
527 infants and children. *Paediatric anaesthesia* **27**, 251 (Mar, 2017).
- 528 10. L. Cornelissen *et al.*, Electroencephalographic markers of brain development during sevoflurane  
529 anaesthesia in children up to 3 years old. *British journal of anaesthesia* **120**, 1274 (Jun, 2018).
- 530 11. S. Koch *et al.*, Electroencephalogram dynamics in children during different levels of anaesthetic  
531 depth. *Clinical neurophysiology : official journal of the International Federation of Clinical*  
532 *Neurophysiology* **128**, 2014 (Oct, 2017).
- 533 12. K. Hayashi, K. Shigemi, T. Sawa, Neonatal electroencephalography shows low sensitivity to  
534 anesthesia. *Neuroscience letters* **517**, 87 (May 31, 2012).
- 535 13. A. J. Davidson, G. H. Huang, C. S. Rebmann, C. Ellery, Performance of entropy and Bispectral  
536 Index as measures of anaesthesia effect in children of different ages. *British journal of*  
537 *anaesthesia* **95**, 674 (Nov, 2005).
- 538 14. S. S. Lo *et al.*, Anesthetic-specific electroencephalographic patterns during emergence from  
539 sevoflurane and isoflurane in infants and children. *Paediatric anaesthesia* **19**, 1157 (Dec, 2009).
- 540 15. P. L. Purdon, A. Sampson, K. J. Pavone, E. N. Brown, Clinical Electroencephalography for  
541 Anesthesiologists: Part I: Background and Basic Signatures. *Anesthesiology* **123**, 937 (Oct, 2015).
- 542 16. S. Chauvette, S. Crochet, M. Volgushev, I. Timofeev, Properties of slow oscillation during slow-  
543 wave sleep and anesthesia in cats. *The Journal of neuroscience : the official journal of the Society*  
544 *for Neuroscience* **31**, 14998 (Oct 19, 2011).
- 545 17. M. T. Alkire, A. G. Hudetz, G. Tononi, Consciousness and anesthesia. *Science* **322**, 876 (Nov 7,  
546 2008).
- 547 18. M. D. Kertai, E. L. Whitlock, M. S. Avidan, Brain monitoring with electroencephalography and the  
548 electroencephalogram-derived bispectral index during cardiac surgery. *Anesthesia and analgesia*  
549 **114**, 533 (Mar, 2012).
- 550 19. M. Milh *et al.*, Rapid cortical oscillations and early motor activity in premature human neonate.  
551 *Cerebral cortex* **17**, 1582 (Jul, 2007).
- 552 20. J. M. O'Toole, G. B. Boylan, S. Vanhatalo, N. J. Stevenson, Estimating functional brain maturity in  
553 very and extremely preterm neonates using automated analysis of the electroencephalogram.  
554 *Clinical neurophysiology : official journal of the International Federation of Clinical*  
555 *Neurophysiology* **127**, 2910 (Aug, 2016).
- 556 21. L. J. Stolwijk *et al.*, Effect of general anesthesia on neonatal aEEG-A cohort study of patients with  
557 non-cardiac congenital anomalies. *PloS one* **12**, e0183581 (2017).

- 558 22. P. S. Chang, S. M. Walker, M. Fitzgerald, Differential Suppression of Spontaneous and Noxious-  
559 evoked Somatosensory Cortical Activity by Isoflurane in the Neonatal Rat. *Anesthesiology* **124**,  
560 885 (Apr, 2016).
- 561 23. R. Khazipov *et al.*, Early motor activity drives spindle bursts in the developing somatosensory  
562 cortex. *Nature* **432**, 758 (Dec 9, 2004).
- 563 24. M. T. Colonnese, R. Khazipov, "Slow activity transients" in infant rat visual cortex: a spreading  
564 synchronous oscillation patterned by retinal waves. *The Journal of neuroscience : the official*  
565 *journal of the Society for Neuroscience* **30**, 4325 (Mar 24, 2010).
- 566 25. I. L. Hanganu, Y. Ben-Ari, R. Khazipov, Retinal waves trigger spindle bursts in the neonatal rat  
567 visual cortex. *The Journal of neuroscience : the official journal of the Society for Neuroscience* **26**,  
568 6728 (Jun 21, 2006).
- 569 26. M. D. Brockmann, B. Poschel, N. Cichon, I. L. Hanganu-Opatz, Coupled oscillations mediate  
570 directed interactions between prefrontal cortex and hippocampus of the neonatal rat. *Neuron* **71**,  
571 332 (Jul 28, 2011).
- 572 27. S. Gretenkord *et al.*, Coordinated electrical activity in the olfactory bulb gates the oscillatory  
573 entrainment of entorhinal networks in neonatal mice. *bioRxiv*, (2018).
- 574 28. S. H. Bitzenhofer *et al.*, Layer-specific optogenetic activation of pyramidal neurons causes beta-  
575 gamma entrainment of neonatal networks. *Nature communications* **8**, 14563 (Feb 20, 2017).
- 576 29. Y. Huh, J. Cho, Urethane anesthesia depresses activities of thalamocortical neurons and alters its  
577 response to nociception in terms of dual firing modes. *Frontiers in behavioral neuroscience* **7**, 141  
578 (2013).
- 579 30. L. Voss, J. Sleight, Monitoring consciousness: the current status of EEG-based depth of  
580 anaesthesia monitors. *Best practice & research. Clinical anaesthesiology* **21**, 313 (Sep, 2007).
- 581 31. R. G. Bettinardi, N. Tort-Colet, M. Ruiz-Mejias, M. V. Sanchez-Vives, G. Deco, Gradual  
582 emergence of spontaneous correlated brain activity during fading of general anesthesia in rats:  
583 Evidences from fMRI and local field potentials. *NeuroImage* **114**, 185 (Jul 1, 2015).
- 584 32. S. Sarasso *et al.*, Consciousness and Complexity during Unresponsiveness Induced by Propofol,  
585 Xenon, and Ketamine. *Current biology : CB* **25**, 3099 (Dec 7, 2015).
- 586 33. F. Ferrarelli *et al.*, Breakdown in cortical effective connectivity during midazolam-induced loss of  
587 consciousness. *Proceedings of the National Academy of Sciences of the United States of America*  
588 **107**, 2681 (Feb 9, 2010).
- 589 34. L. D. Lewis *et al.*, Rapid fragmentation of neuronal networks at the onset of propofol-induced  
590 unconsciousness. *Proceedings of the National Academy of Sciences of the United States of*  
591 *America* **109**, E3377 (Dec 4, 2012).
- 592 35. J. Ahlbeck, L. Song, M. Chini, S. H. Bitzenhofer, I. L. Hanganu-Opatz, Glutamatergic drive along  
593 the septo-temporal axis of hippocampus boosts prelimbic oscillations in the neonatal mouse. *eLife*  
594 **7**, (Apr 10, 2018).
- 595 36. M. Vinck, M. van Wingerden, T. Womelsdorf, P. Fries, C. M. Pennartz, The pairwise phase  
596 consistency: a bias-free measure of rhythmic neuronal synchronization. *NeuroImage* **51**, 112 (May  
597 15, 2010).
- 598 37. R. Gao, E. J. Peterson, B. Voytek, Inferring synaptic excitation/inhibition balance from field  
599 potentials. *NeuroImage* **158**, 70 (Sep, 2017).
- 600 38. Q. Liu, L. Ma, S. Z. Fan, M. F. Abbod, J. S. Shieh, Sample entropy analysis for the estimating  
601 depth of anaesthesia through human EEG signal at different levels of unconsciousness during  
602 surgeries. *PeerJ* **6**, e4817 (2018).
- 603 39. Z. Liang *et al.*, EEG entropy measures in anesthesia. *Frontiers in computational neuroscience* **9**,  
604 16 (2015).
- 605 40. S. Hagihira, Changes in the electroencephalogram during anaesthesia and their physiological  
606 basis. *British journal of anaesthesia* **115 Suppl 1**, i27 (Jul, 2015).
- 607 41. R. Poorun *et al.*, Electroencephalography during general anaesthesia differs between term-born  
608 and premature-born children. *Clinical neurophysiology : official journal of the International*  
609 *Federation of Clinical Neurophysiology* **127**, 1216 (Feb, 2016).



- 610 42. C. M. Anderson, F. Torres, A. Faoro, The EEG of the early premature. *Electroencephalography*  
611 *and clinical neurophysiology* **60**, 95 (Feb, 1985).
- 612 43. J. A. Connell, R. Oozeer, V. Dubowitz, Continuous 4-channel EEG monitoring: a guide to  
613 interpretation, with normal values, in preterm infants. *Neuropediatrics* **18**, 138 (Aug, 1987).
- 614 44. M. D. Lamblin *et al.*, [Electroencephalography of the premature and term newborn. Maturation  
615 aspects and glossary]. *Neurophysiologie clinique = Clinical neurophysiology* **29**, 123 (Apr, 1999).
- 616 45. M. F. Vecchierini, A. M. d'Allest, P. Verpillat, EEG patterns in 10 extreme premature neonates with  
617 normal neurological outcome: qualitative and quantitative data. *Brain & development* **25**, 330  
618 (Aug, 2003).
- 619 46. M. F. Vecchierini, M. Andre, A. M. d'Allest, Normal EEG of premature infants born between 24  
620 and 30 weeks gestational age: terminology, definitions and maturation aspects. *Neurophysiologie*  
621 *clinique = Clinical neurophysiology* **37**, 311 (Oct-Nov, 2007).
- 622 47. N. J. Stevenson *et al.*, Functional maturation in preterm infants measured by serial recording of  
623 cortical activity. *Scientific reports* **7**, 12969 (Oct 11, 2017).
- 624 48. J. E. Stockard-Pope, S. S. Werner, R. G. Bickford, *Atlas of neonatal electroencephalography*.  
625 (Raven Press, New York, 1992).
- 626 49. P. Hans, P. Y. Dewandre, J. F. Brichant, V. Bonhomme, Comparative effects of ketamine on  
627 Bispectral Index and spectral entropy of the electroencephalogram under sevoflurane  
628 anaesthesia. *British journal of anaesthesia* **94**, 336 (2005).
- 629 50. J. B. Ackman, H. Zeng, M. C. Crair, Structured dynamics of neural activity across developing  
630 neocortex. *bioRxiv*, (2014).
- 631 51. K. Kirmse *et al.*, GABA depolarizes immature neurons and inhibits network activity in the neonatal  
632 neocortex in vivo. *Nature communications* **6**, 7750 (Jul 16, 2015).
- 633 52. M. Steriade, A. Nunez, F. Amzica, Intracellular analysis of relations between the slow (< 1 Hz)  
634 neocortical oscillation and other sleep rhythms of the electroencephalogram. *The Journal of*  
635 *neuroscience : the official journal of the Society for Neuroscience* **13**, 3266 (Aug, 1993).
- 636 53. E. N. Brown, K. J. Pavone, M. Naranjo, Multimodal General Anesthesia: Theory and Practice.  
637 *Anesthesia and analgesia* **127**, 1246 (Nov, 2018).
- 638 54. L. Cornelissen *et al.*, Clinical signs and electroencephalographic patterns of emergence from  
639 sevoflurane anaesthesia in children: An observational study. *European journal of anaesthesiology*  
640 **35**, 49 (Jan, 2018).
- 641 55. N. B. Cichon, M. Denker, S. Grun, I. L. Hanganu-Opatz, Unsupervised classification of neocortical  
642 activity patterns in neonatal and pre-juvenile rodents. *Frontiers in neural circuits* **8**, 50 (2014).
- 643 56. G. Nolte *et al.*, Identifying true brain interaction from EEG data using the imaginary part of  
644 coherency. *Clinical neurophysiology : official journal of the International Federation of Clinical*  
645 *Neurophysiology* **115**, 2292 (Oct, 2004).
- 646 57. M. A. Migut, M. Worring, C. J. Veenman, Visualizing multi-dimensional decision boundaries in 2D.  
647 *Data Mining and Knowledge Discovery* **29**, 273 (January 01, 2015).
- 648

649 **Acknowledgements:** We thank P. Putthoff, A. Marquardt, A. Dahlmann, and K. Titze for  
650 excellent technical assistance. **Funding:** This work was funded by grants from the  
651 European Research Council (ERC-2015-CoG 681577 to I.L.H.-O.), the German  
652 Research Foundation (Ha 4466/10-1, SPP 1665, SFB 936 B5 to I.L.H.-O.) and the  
653 International Anesthesia Research Society (to L.C.).

654 I.L. H.-O. is member of FENS Kavli Network of Excellence.

655  
656 **Author contributions:** M.C., S.H.B. and I.L.H.-O. designed the experiments, M.C.,  
657 S.H.B., S.G., J.K.K., J.A.P., and L.C. carried out the experiments, M.C., S.H.B., S.G.,  
658 J.K.K. and J.A.P. analyzed the data, M.C., S.H.B., L.C., C.B.B. and I.L.H.-O. interpreted  
659 the data and wrote the paper. All authors discussed and commented on the manuscript.

660

661 **Figures and Tables**

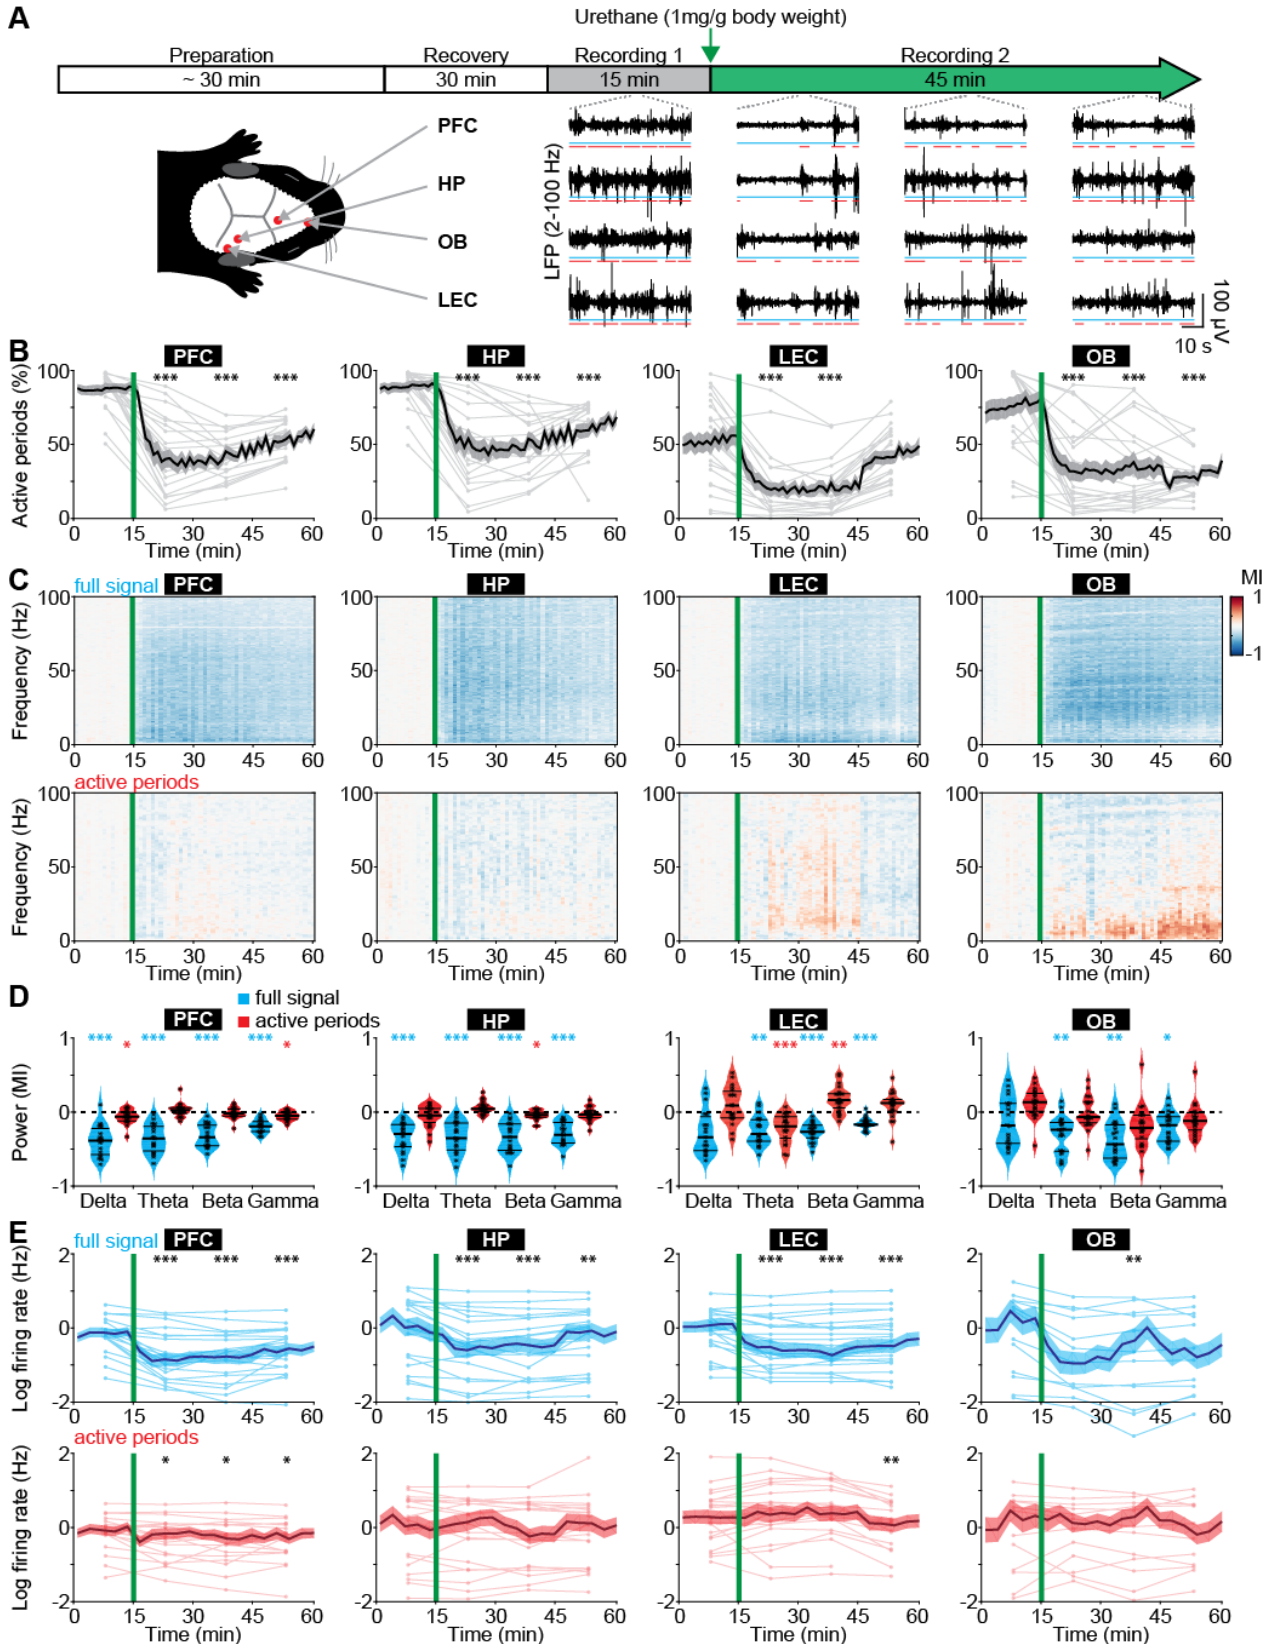

662

663 **Fig. 1. Frequency-unspecific dampening of neuronal activity during urethane**  
664 **anesthesia in neonatal mice. (A)** Schematic representation of experimental paradigm  
665 and recording sites as well as characteristic LFP recordings of discontinuous activity in  
666 the PFC, HP, LEC, and OB of neonatal mice (P8-10) during non-anesthetized and  
667 urethane-anesthetized state. Time windows of active periods are marked by red lines.  
668 **(B)** Line plots displaying the relative occurrence of active periods normalized to total  
669 recording time in PFC, HP, OB and LEC before and after urethane injection. **(C)** Color-  
670 coded MI of power spectra for full signal (top) and active periods (bottom) recorded in  
671 PFC, HP, LEC and OB of neonatal mice before and after urethane injection. **(D)** Violin  
672 plots displaying the MI of power in delta (2-4 Hz), theta-alpha (4-12 Hz), beta (12-30 Hz)  
673 and gamma (30-100 Hz) frequency bands for full signal (blue) and active periods (red)  
674 recorded in the PFC, HP, LEC and OB. **(E)** Line plots displaying MUA rates during full  
675 signal (blue) and active periods (red). In (B), (C) and (E) green lines correspond to the  
676 time point of urethane injection.  
677

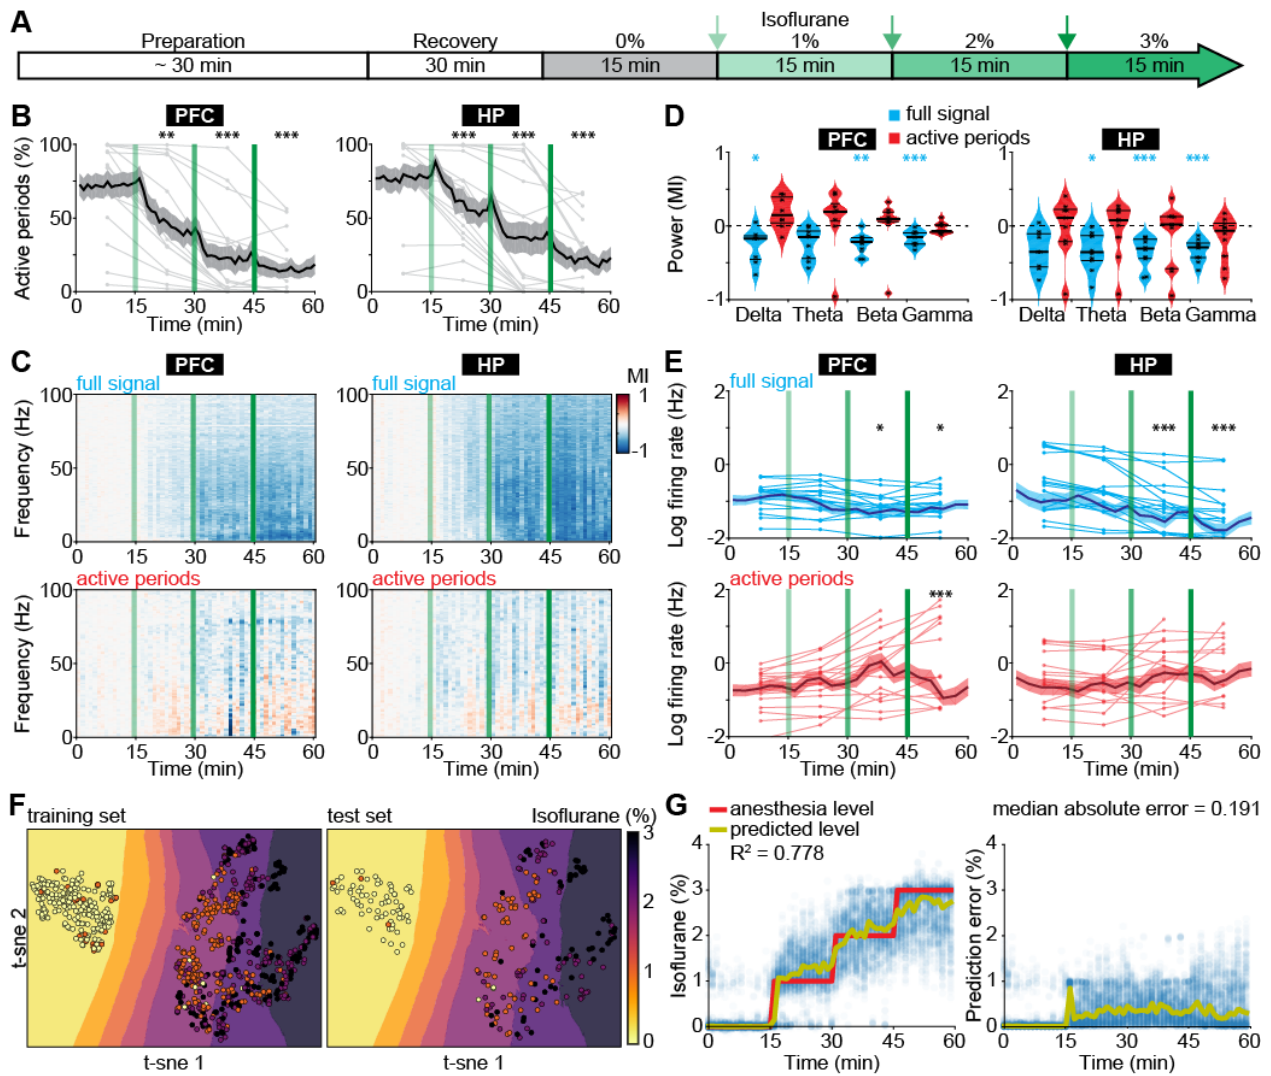

678  
 679 **Fig. 2. Suppression of active periods in relationship with the depth of isoflurane**  
 680 **anesthesia in neonatal mice. (A)** Schematic representation of experimental protocol  
 681 for LFP recordings without anesthesia and during increasing levels of isoflurane  
 682 anesthesia in neonatal mice (P8-10). **(B)** Line plots displaying the relative occurrence of  
 683 active periods in PFC and HP during increasing levels of isoflurane anesthesia. **(C)**  
 684 Color-coded MI of power spectra for full signal (top) and active periods (bottom) during  
 685 increasing levels of isoflurane anesthesia. **(D)** Violin plots displaying the MI of power in  
 686 delta (2-4 Hz), theta (4-12 Hz), beta (12-30 Hz) and gamma (30-100 Hz) frequency  
 687 bands for full signal (blue) and active periods (red). **(E)** Line plots displaying MUA firing

688 rates during full signal (blue) and active periods (red). In (B), (C) and (E) green lines  
689 correspond to the time points of increasing isoflurane anesthesia. (F) Visualization of  
690 anesthesia depth prediction by t-sne plots. Background color codes for predicted  
691 anesthesia depth, while the color of the dots represents the actual anesthesia level in  
692 the training (left) and test set (right). (G) Scatter plots displaying anesthesia depth  
693 predictions with support vector regression (left) and absolute errors between anesthesia  
694 depth prediction and actual anesthesia depth (right).

695

Anesthesia and network dynamics during development

Chini et al.

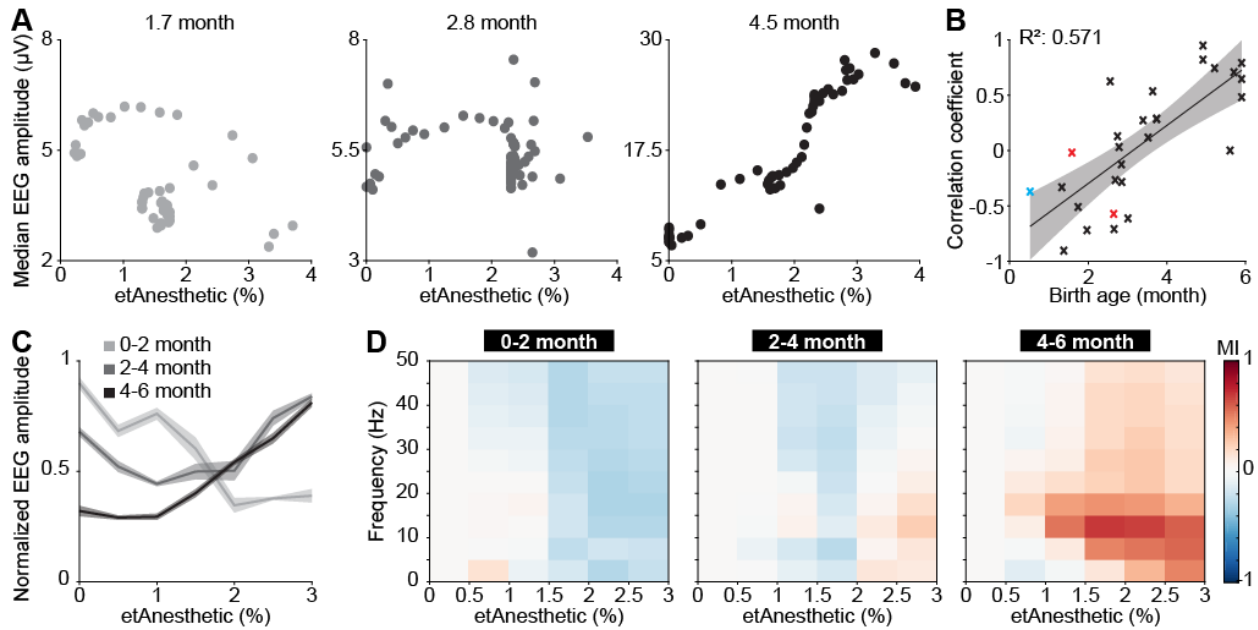

696

697 **Fig. 3. Age-dependent switch from broadband suppression to frequency-specific**

698 **effects of general anesthesia on EEG activity in human neonates and infants. (A)**

699 Scatter plots displaying the median EEG amplitude as a function of anesthetic

700 concentration for representative examples of 0-2, 2-4 and 4-6 months of age. (B) Scatter

701 plot displaying the correlation coefficient of median EEG amplitude and anesthetic

702 concentration in relationship to birth age for sevoflurane (black), isoflurane (red), and

703 desflurane (blue). (C) Line plots displaying normalized EEG amplitude as a function of

704 anesthetic concentration. (D) Color-coded MI of median EEG amplitudes in different

705 frequency bands as a function of anesthetic concentration for human babies of 0-2

706 months (left), 2-4 months (middle) and 4-6 months (right).

707

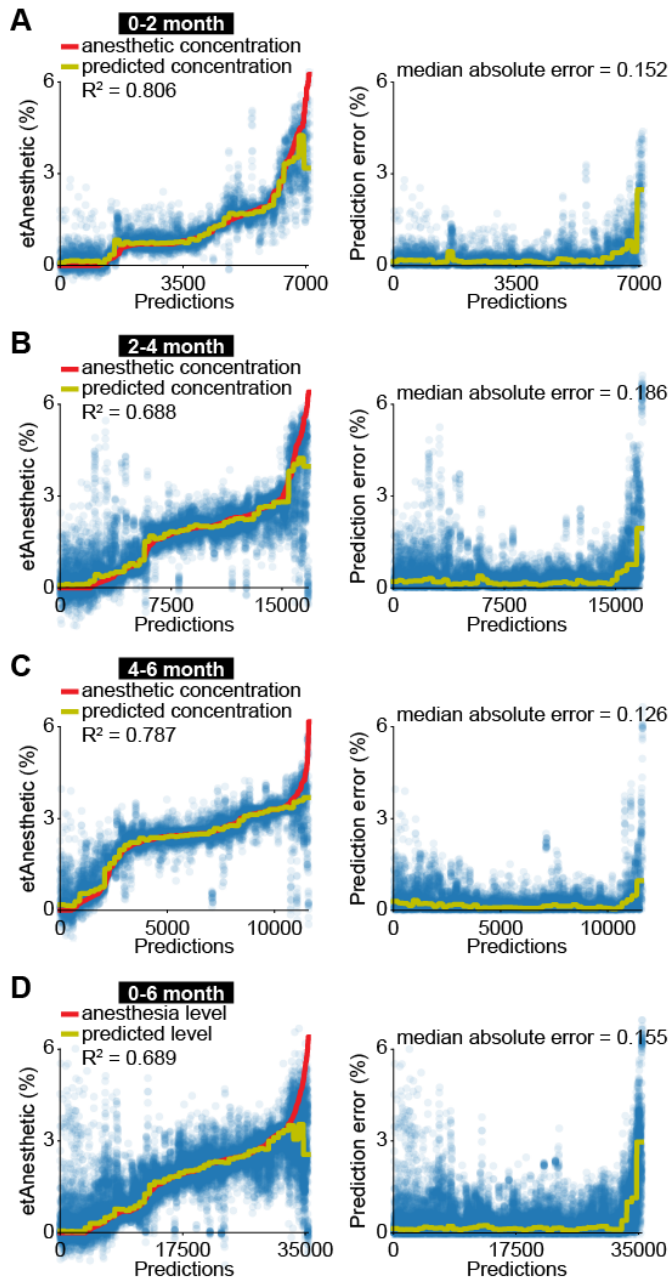

708

709 **Fig. 4. EEG activity is predictive for anesthetic concentration in human infants. (A)**

710 Scatter plots displaying anesthetic concentration predictions of support vector regression

711 (left) and absolute errors between anesthetic concentration prediction and actual

712 anesthetic concentration (right) for human neonates of 0-2 months. **(B)** Same as (A) for

713 human infants of 2-4 months. **(C)** Same as (A) for human infants of 4-6 months. **(D)**

714 Same as (A) for human neonates and infants of 0-6 months.



715 **List of supplementary Materials**

716 Fig. S1. Urethane anesthesia does not affect spectral features and timing of activity in  
717 neonatal mice.

718 Fig. S2. Frequency-specific effects of urethane anesthesia in juvenile mice.

719 Fig. S3. Machine learning algorithm.

720 Fig: S4: Median amplitude is most informative for predicting anesthetic concentration in  
721 neonatal mice.

722 Fig. S5. EEG data processing.

723 Fig. S6. Age-dependent switch from broadband suppression to frequency-specific  
724 effects of general anesthesia on EEG activity for post conceptual age and frontal  
725 electrodes.

726 Fig. S7. Features predicting anesthetic concentration from EEG recordings in human  
727 infants.

728 Tab. S1. Demographic information.

729 Tab. S2. Statistics summary.

730

731 **Supplementary Materials**

732 **Identifying neurophysiological features associated**  
733 **with anesthetic state in newborn mice and humans**

734 **Mattia Chini<sup>1</sup>, Sabine Gretenkord<sup>1</sup>, Johanna K. Kostka<sup>1</sup>,**  
735 **Jastyn A. Pöpplau<sup>1</sup>, Laura Cornelissen<sup>2,3</sup>, Charles B. Berde<sup>2,3</sup>,**  
736 **Ileana L. Hanganu-Opatz<sup>1,\*</sup> & Sebastian H. Bitzenhofer<sup>1,\*</sup>**  
737

738  
739 <sup>1</sup> Developmental Neurophysiology, Institute of Neuroanatomy, University Medical Center  
740 Hamburg-Eppendorf, Hamburg, Germany  
741 <sup>2</sup> Department of Anesthesiology, Critical Care and Pain Medicine, Boston Children's  
742 Hospital, Boston, Massachusetts  
743 <sup>3</sup> Department of Anaesthesia, Harvard Medical School, Boston, Massachusetts

744  
745 \* Equal contribution  
746  
747

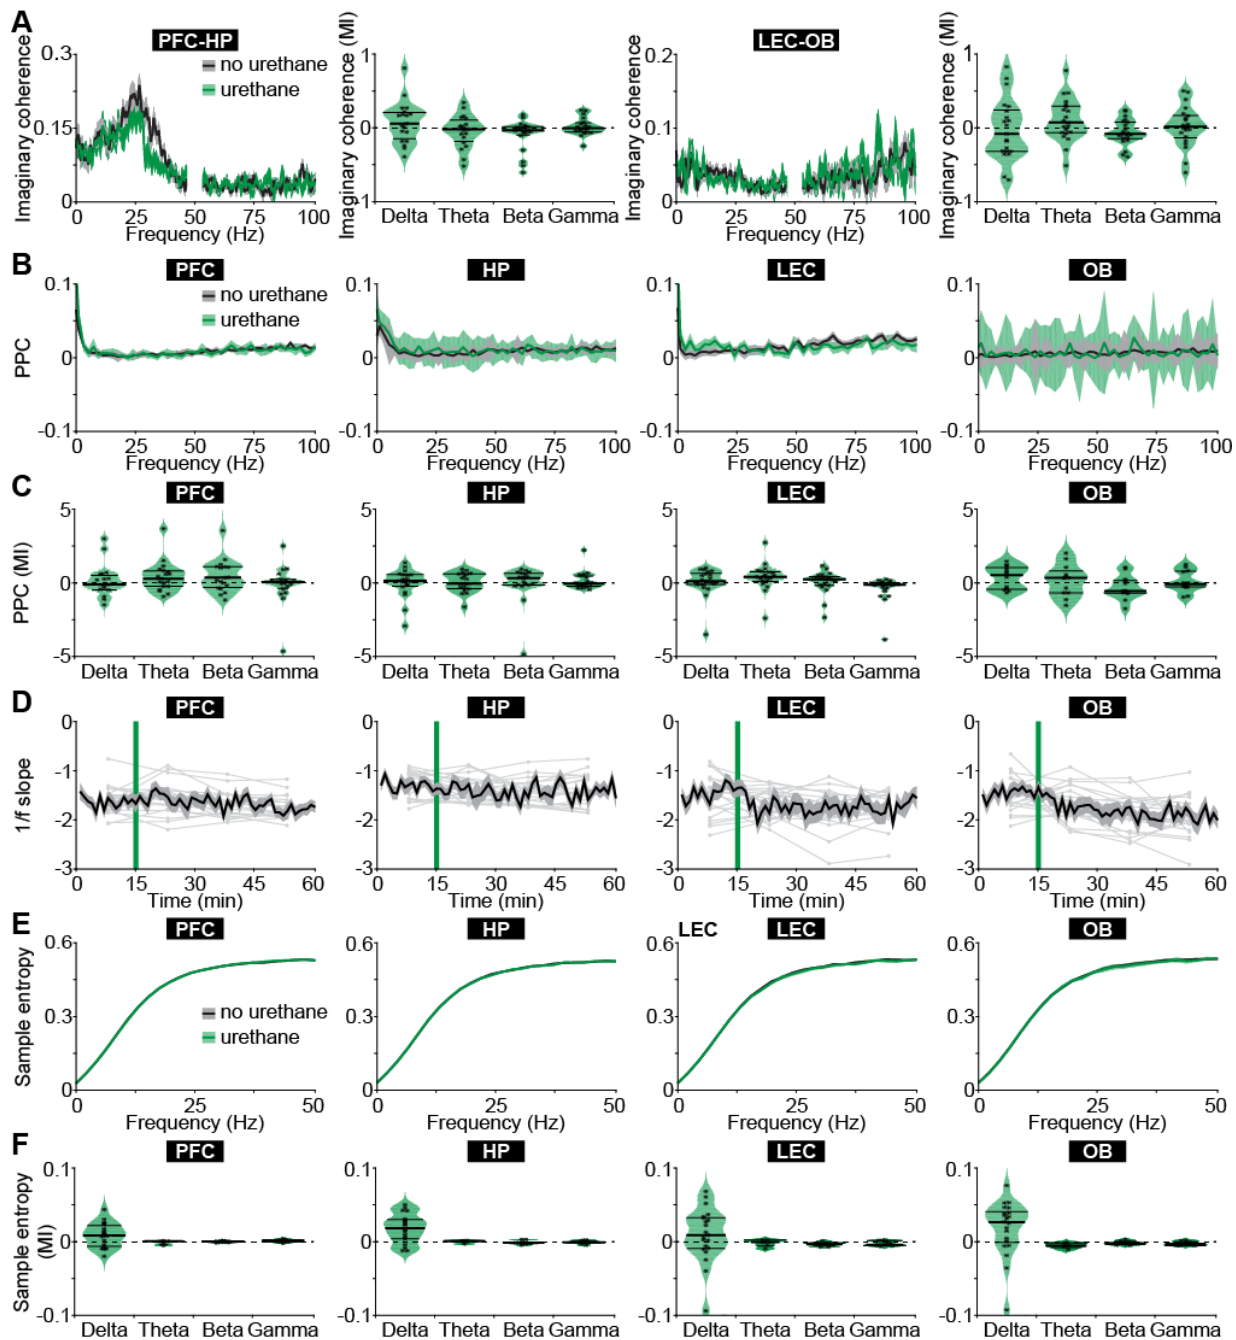

748

749 **Fig. S1. Urethane anesthesia does not affect spectral features and timing of**

750 **activity in neonatal mice. (A)** Line plots displaying the imaginary coherence between

751 PFC-HP and LEC-OB in neonatal mice (P8-10) as a function of frequency before (black)

752 and after (green) urethane injection. Violin plots displaying the MI of the imaginary

753 coherence in delta (2-4 Hz), theta-alpha (4-12 Hz), beta (12-30 Hz) and gamma (30-100

754 Hz) frequency bands. **(B)** Line plots displaying the PPC of MUA to the oscillatory phase  
755 before and after urethane injection. **(C)** Violin plots displaying the MI of PPC in delta,  
756 theta, beta and gamma frequency bands. **(D)** Line plots displaying the slope of the 1/f  
757 decay for gamma frequencies over time. Green lines mark the time point of urethane  
758 injection. **(E)** Line plots displaying the sample entropy as a function of frequency before  
759 and after urethane injection. **(F)** Violin plots displaying the MI of the sample entropy in  
760 delta, theta, beta and gamma frequency bands.

761

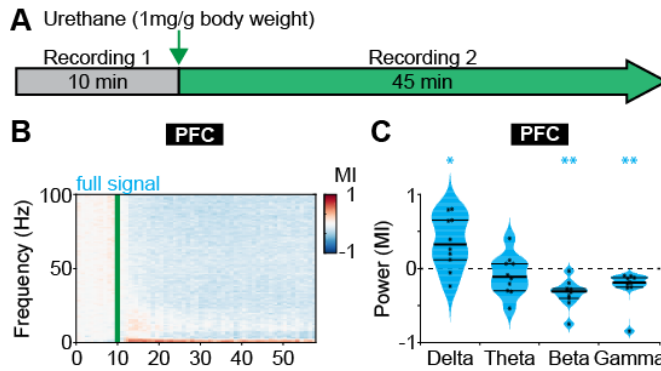

762

763 **Fig. S2. Frequency-specific effects of urethane anesthesia in juvenile mice. (A)**

764 Schematic representation of experimental paradigm of LFP recordings in PFC of non-

765 anesthetized and urethane-anesthetized juvenile mice (P24-39). **(B)** Color-coded MI of

766 oscillatory power for full signal before and after urethane injection. Green line

767 corresponds to the time point of urethane injection. **(C)** Violin plots displaying the MI of

768 oscillatory power in delta (2-4 Hz), theta-alpha (4-12 Hz), beta (12-30 Hz) and gamma

769 (30-100 Hz) frequency bands for full signal.

770

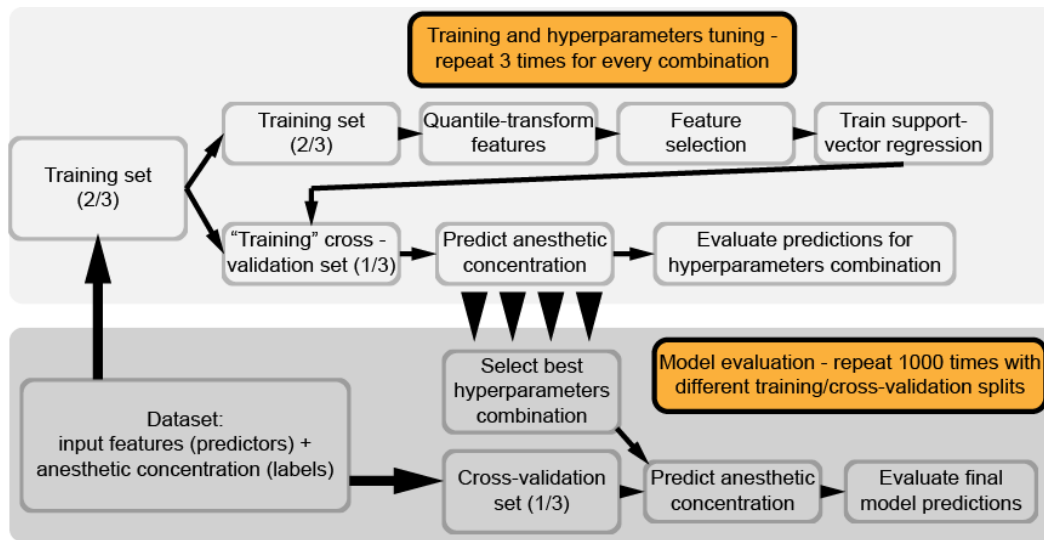

771

772 **Fig. S3. Machine learning algorithm.** Flowchart depicting steps for machine learning

773 algorithm.

774

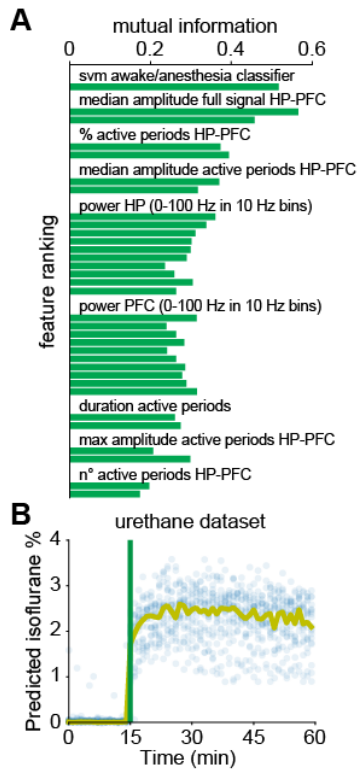

775

776 **Fig. S4. Median amplitude is most informative for predicting anesthetic**  
777 **concentration in neonatal mice. (A)** Bar plot displaying the feature ranking for  
778 anesthesia depth prediction by mutual information between each feature and anesthesia  
779 depth. **(B)** Scatter plot displaying predicted isoflurane concentration using features of  
780 LFP recordings from PFC and HP of urethane-anesthetized mice. Green line marks the  
781 time point of urethane injection.

782

Anesthesia and network dynamics during development

*Chini et al.*

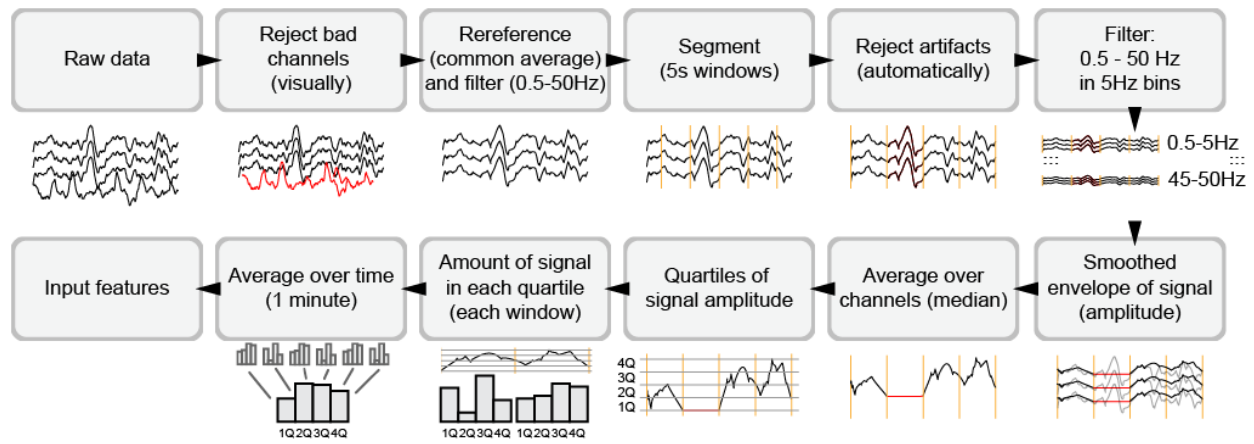

783

784 **Fig. S5. EEG data processing.** Flowchart depicting analysis steps for EEG data  
785 processing.

786



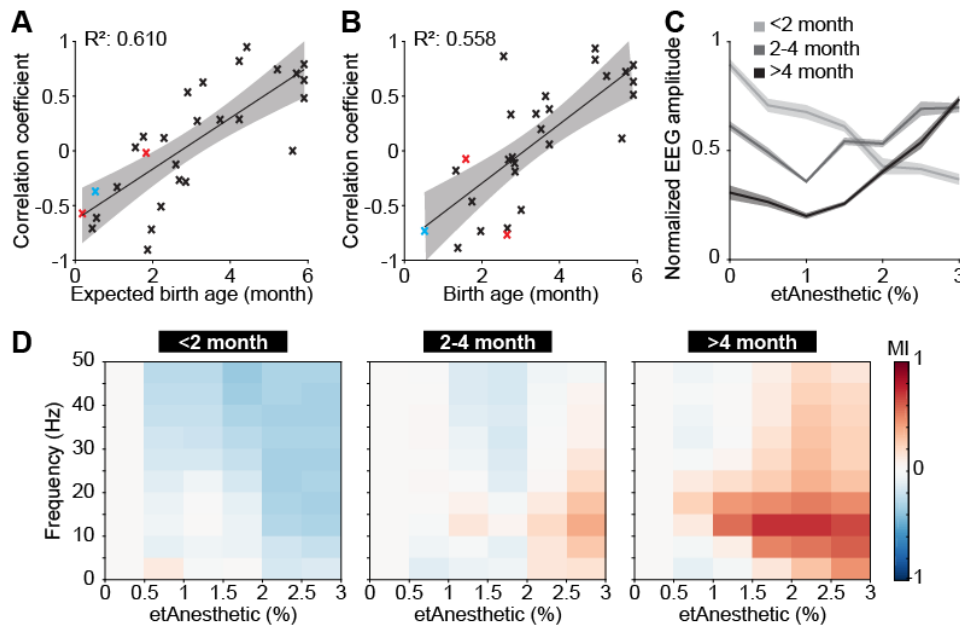

787

788 **Fig. S6. Age-dependent switch from broadband suppression to frequency-specific**

789 **effects of general anesthesia on EEG activity for post conceptual age and frontal**

790 **electrodes. (A)** Scatter plot displaying the correlation coefficient of median EEG

791 amplitude and anesthetic concentration in relationship to expected birth age for

792 sevoflurane (black), isoflurane (red), and desflurane (blue). **(B)** Scatter plot displaying

793 the correlation coefficient of median EEG amplitude of frontal electrodes and anesthetic

794 concentration in relationship to birth age for sevoflurane (black), isoflurane (red), and

795 desflurane (blue). **(C)** Line plots displaying normalized EEG amplitude of frontal

796 electrodes as a function of anesthetic concentration. **(D)** Color-coded MI of median EEG

797 amplitudes of frontal electrodes in different frequency bands as a function of anesthetic

798 concentration for human babies of 0-2 months (left), 2-4 months (middle) and 4-6

799 months (right).

800

Anesthesia and network dynamics during development

Chini et al.

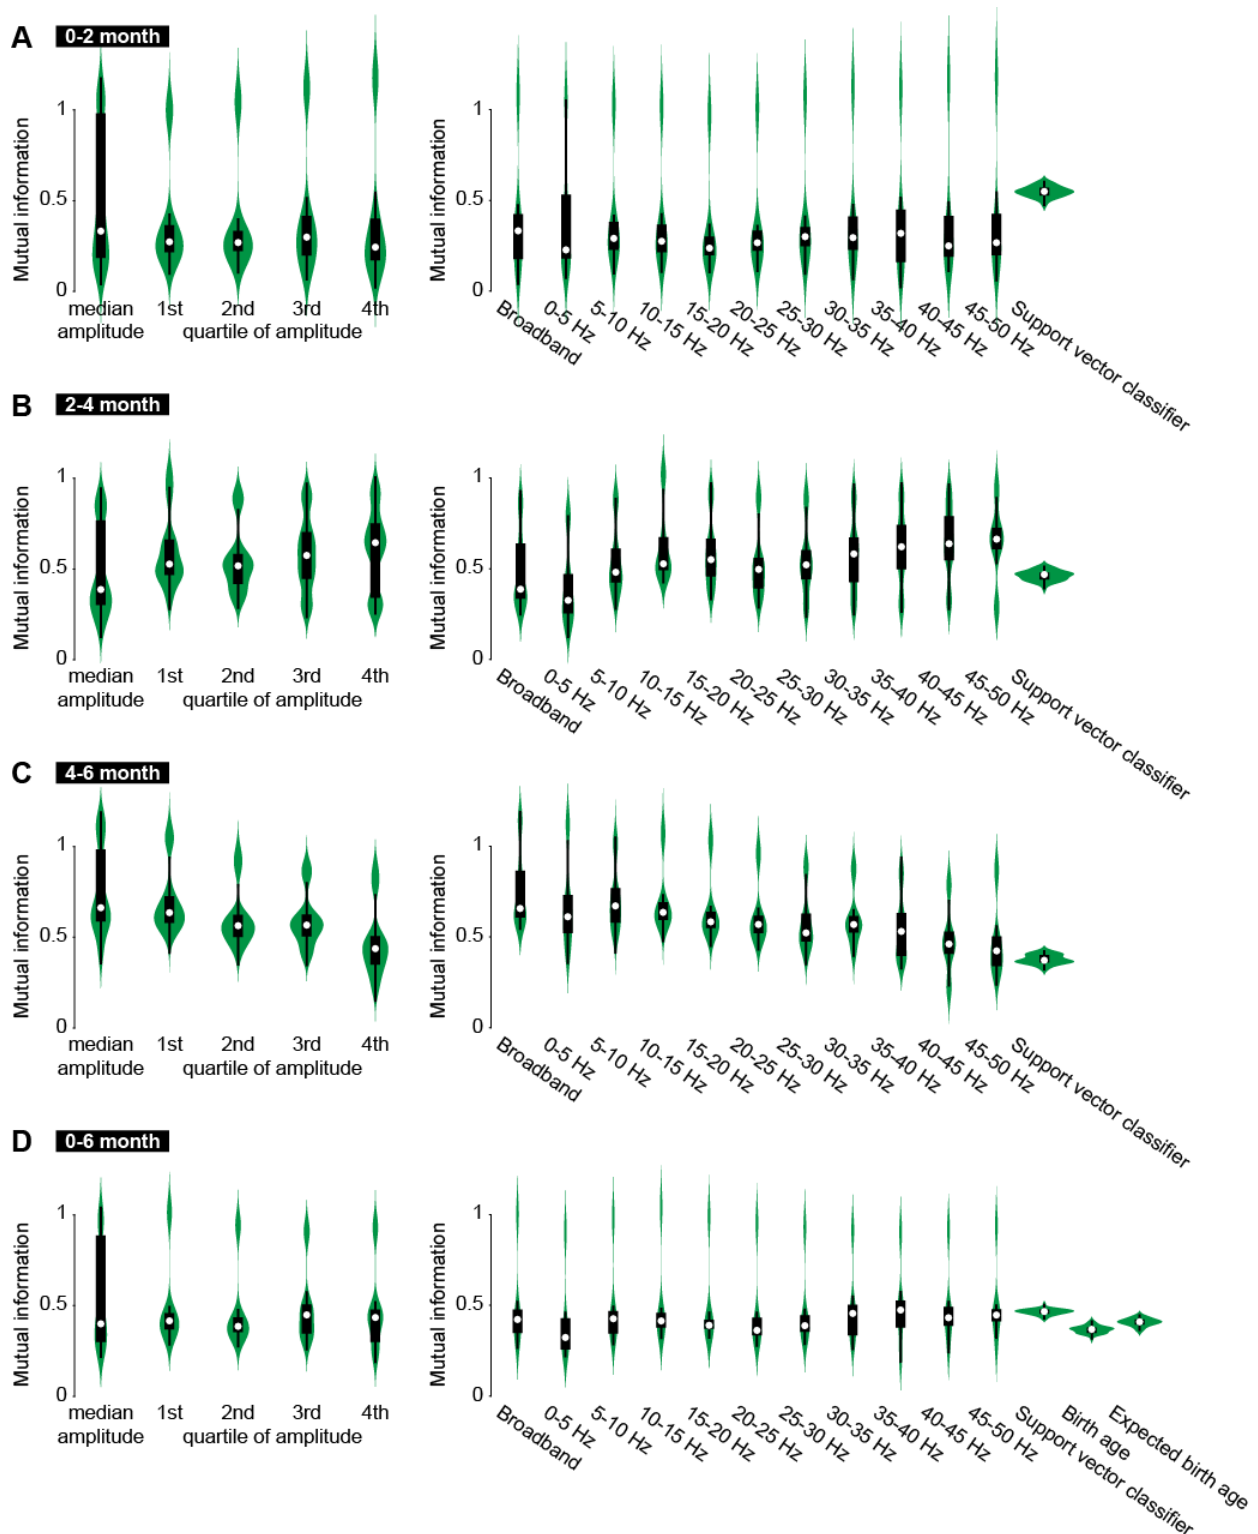

801  
802 **Fig. S7. Features predicting anesthetic concentration from EEG recordings in**  
803 **human infants. (A)** Violin plots displaying mutual information between each feature and  
804 predicted anesthetic concentration for amplitude-related features (left) and frequency-

805 related features (right) for human infants of 0-2 months of age. **(B)** Same as (A) for  
806 human infants of 2-4 months of age. **(C)** Same as (A) for human infants of 4-6 months of  
807 age. **(D)** Same as (A) for human infants of 0-6 months of age.

808

809 **Tab. S1. Demographic information.**

|                                            | <b>All Subjects</b>   |                         | <b>Age Groups</b>      |                      |
|--------------------------------------------|-----------------------|-------------------------|------------------------|----------------------|
|                                            | <b>0-6 months</b>     | <b>0-2 months</b>       | <b>2-4 months</b>      | <b>4-6 months</b>    |
|                                            | <b>N=35</b>           | <b>n=6</b>              | <b>n=19</b>            | <b>n=10</b>          |
| Age at birth (weeks; median, IQR)          | 38.00 [36.64, 39.00]  | 39.71 [38.25, 40.53]    | 37.00 [34.00, 39.00]   | 39.00 [37.44, 39.00] |
| PNA (months; median, IQR)                  | 3.06 [2.64, 4.42]     | 1.51 [1.36, 1.73]       | 2.89 [2.74, 3.52]      | 5.54 [5.08, 5.91]    |
| Weight (kg, median, IQR)                   | 5.97 [4.89, 7.09]     | 4.91 [4.80, 5.01]       | 5.76 [4.89, 6.62]      | 7.29 [6.42, 8.10]    |
| Male (n, %)                                | 30 (85.7)             | 5 (83.3)                | 16 (84.2)              | 9 (90.0)             |
| Duration of Anesthesia (mins; median, IQR) | 114.00 [82.5, 181.00] | 190.00 [123.50, 211.50] | 114.00 [85.00, 154.00] | 89.00 [76.5, 181.75] |

810

| <b>ID</b> | <b>Age at birth (weeks)</b> | <b>Postnatal age (months)</b> | <b>Weight (kg)</b> | <b>Sex</b> | <b>Surgery</b>                          | <b>Duration Anesthesia</b> |
|-----------|-----------------------------|-------------------------------|--------------------|------------|-----------------------------------------|----------------------------|
| 1         | 39,0                        | 0,53                          | 3,7                | Female     | Anorectoplasty                          | 217                        |
| 2         | 38,0                        | 1,35                          | 5,7                | Male       | Hernia Repair                           | 103                        |
| 3         | 41,0                        | 1,41                          | 4,8                | Male       | Hernia Repair                           | 93                         |
| 4         | 40,4                        | 1,61                          | 5,0                | Male       | Extrophy of Bladder Closure, Spica Cast | 185                        |
| 5         | 40,6                        | 1,77                          | 4,8                | Male       | Colostomy Closure                       | 268                        |
| 6         | 37,5                        | 1,87                          | 5,0                | Male       | Hernia Repair, Frenulotomy              | 195                        |
| 7         | 39,0                        | 2,04                          | 5,0                | Male       | Circumcision                            | 60                         |
| 8         | 42,0                        | 2,60                          | 6,0                | Male       | Hernia Repair                           | 89                         |
| 9         | 34,0                        | 2,60                          | 4,8                | Male       | Hernia Repair                           | 103                        |
| 10        | 29,1                        | 2,69                          | 3,3                | Male       | Hernia Repair, Circumcision             | 152                        |
| 11        | 39,0                        | 2,73                          | 7,2                | Male       | Hernia Repair, Orchidopexy              | 187                        |
| 12        | 30,3                        | 2,76                          | 3,4                | Male       | Hernia Repair                           | 149                        |
| 13        | 35,4                        | 2,79                          | 4,7                | Male       | Hernia Repair, Meatoplasty              | 114                        |
| 14        | 34,0                        | 2,83                          | 5,0                | Male       | Hernia Repair                           | 79                         |
| 15        | 39,0                        | 2,89                          | 6,1                | Female     | Hernia Repair                           | 96                         |
| 16        | 37,0                        | 2,89                          | 6,3                | Male       | Hernia Repair                           | 140                        |
| 17        | 39,0                        | 3,02                          | 5,8                | Female     | Vaginoscopy                             | 156                        |
| 18        | 29,0                        | 3,06                          | 4,2                | Male       | Hernia Repair                           | 185                        |
| 19        | 38,0                        | 3,45                          | 6,9                | Male       | Hernia Repair                           | 72                         |

Anesthesia and network dynamics during development

Chini et al.

|    |      |      |     |        |                    |     |
|----|------|------|-----|--------|--------------------|-----|
| 20 | 39,0 | 3,52 | 7,2 | Male   | Fistulotomy        | 58  |
| 21 | 37,0 | 3,52 | 6,1 | Female | Nephrectomy        | 170 |
| 22 | 37,0 | 3,58 | 5,7 | Male   | Hernia Repair      | 118 |
| 23 | 41,0 | 3,71 | 5,8 | Male   | Hernia Repair      | 102 |
| 24 | 39,0 | 3,81 | 7,0 | Male   | Pyleoplasty        | 177 |
| 25 | 39,0 | 3,81 | 7,6 | Male   | Fistulotomy        | 81  |
| 26 | 39,0 | 4,04 | 7,4 | Male   | Hernia Repair      | 94  |
| 27 | 42,0 | 4,80 | 6,3 | Female | Hernia Repair      | 76  |
| 28 | 29,1 | 5,03 | 7,8 | Male   | Hernia Repair      | 78  |
| 29 | 38,0 | 5,26 | 6,3 | Male   | Hypospadias Repair | 22  |
| 30 | 39,0 | 5,36 | 8,5 | Male   | Orchidopexy        | 76  |
| 31 | 39,1 | 5,72 | 7,2 | Male   | Colostomy Closure  | 310 |
| 32 | 29,0 | 5,78 | 9,1 | Male   | Fistulotomy        | 62  |
| 33 | 40,4 | 5,95 | 8,2 | Male   | Hypospadias Repair | 189 |
| 34 | 39,0 | 6,01 | 6,7 | Male   | Chordee Release    | 160 |
| 35 | 30,3 | 6,05 | 3,2 | Male   | Circumcision       | 84  |

811

812

813 **Tab. S2. Statistics summary.**

| Figure 1B                                                                                                                                                                                                                                                                                                                                                                                             | Figure 1B                                                                                                                                                                                                                                                                                                                                                                                         | Figure 1B                                                                                                                                                                                                                                                                                                                                                                                      | Figure 1B                                                                                                                                                                                                                                                                                                                                                                                       |
|-------------------------------------------------------------------------------------------------------------------------------------------------------------------------------------------------------------------------------------------------------------------------------------------------------------------------------------------------------------------------------------------------------|---------------------------------------------------------------------------------------------------------------------------------------------------------------------------------------------------------------------------------------------------------------------------------------------------------------------------------------------------------------------------------------------------|------------------------------------------------------------------------------------------------------------------------------------------------------------------------------------------------------------------------------------------------------------------------------------------------------------------------------------------------------------------------------------------------|-------------------------------------------------------------------------------------------------------------------------------------------------------------------------------------------------------------------------------------------------------------------------------------------------------------------------------------------------------------------------------------------------|
| <b>Active periods PFC</b>                                                                                                                                                                                                                                                                                                                                                                             | <b>Active periods HP</b>                                                                                                                                                                                                                                                                                                                                                                          | <b>Active periods LEC</b>                                                                                                                                                                                                                                                                                                                                                                      | <b>Active periods OB</b>                                                                                                                                                                                                                                                                                                                                                                        |
| one-way anova<br>Analysis of Variance of<br>Aligned Rank Transformed<br>Data                                                                                                                                                                                                                                                                                                                          | one-way anova<br>Analysis of Variance of<br>Aligned Rank Transformed<br>Data                                                                                                                                                                                                                                                                                                                      | one-way anova<br>Analysis of Variance of<br>Aligned Rank Transformed<br>Data                                                                                                                                                                                                                                                                                                                   | one-way anova<br>Analysis of Variance of<br>Aligned Rank Transformed<br>Data                                                                                                                                                                                                                                                                                                                    |
| Table Type: Repeated<br>Measures Analysis of<br>Variance Table (Type I)<br>Model: Repeated Measures<br>(aov)<br>Response: art(variable)                                                                                                                                                                                                                                                               | Table Type: Repeated<br>Measures Analysis of<br>Variance Table (Type I)<br>Model: Repeated Measures<br>(aov)<br>Response: art(variable)                                                                                                                                                                                                                                                           | Table Type: Repeated<br>Measures Analysis of<br>Variance Table (Type I)<br>Model: Repeated Measures<br>(aov)<br>Response: art(variable)                                                                                                                                                                                                                                                        | Table Type: Repeated<br>Measures Analysis of<br>Variance Table (Type I)<br>Model: Repeated Measures<br>(aov)<br>Response: art(variable)                                                                                                                                                                                                                                                         |
| Error Df Df.res F value<br>Pr(>F)<br>1 time anm:t 3 54 59.792<br>< 2.22e-16 ***<br>---<br>Signif. codes: 0 '***' 0.001<br>'**' 0.01 '*' 0.05 '.' 0.1 ' ' 1<br>contrast estimate SE df<br>t.ratio p.value<br>1 - 2 35.000000 3.280084<br>54 10.670 <.0001<br>1 - 3 40.105263 3.280084<br>54 12.227 <.0001<br>1 - 4 29.000000 3.280084<br>54 8.841 <.0001<br>2 - 3 5.105263 3.280084<br>54 1.556 0.4118 | Error Df Df.res F value<br>Pr(>F)<br>1 time anm:t 3 54 35.13<br>9.916e-13 ***<br>---<br>Signif. codes: 0 '***' 0.001<br>'**' 0.01 '*' 0.05 '.' 0.1 ' ' 1<br>contrast estimate SE df<br>t.ratio p.value<br>1 - 2 31.894737 3.912163<br>54 8.153 <.0001<br>1 - 3 36.631579 3.912163<br>54 9.364 <.0001<br>1 - 4 26.947368 3.912163<br>54 6.888 <.0001<br>2 - 3 4.736842 3.912163<br>54 1.211 0.6228 | Error Df Df.res F value<br>Pr(>F)<br>1 time anm:t 3 60 29.392<br>8.1185e-12 ***<br>---<br>Signif. codes: 0 '***' 0.001<br>'**' 0.01 '*' 0.05 '.' 0.1 ' ' 1<br>contrast estimate SE df<br>t.ratio p.value<br>1 - 2 26.285714 3.86664<br>60 6.798 <.0001<br>1 - 3 29.142857 3.86664<br>60 7.537 <.0001<br>1 - 4 4.666667 3.86664 60<br>1.207 0.6249<br>2 - 3 2.857143 3.86664 60<br>0.739 0.8810 | Error Df Df.res F value<br>Pr(>F)<br>1 time anm:t 3 60 27.283<br>2.9636e-11 ***<br>---<br>Signif. codes: 0 '***' 0.001<br>'**' 0.01 '*' 0.05 '.' 0.1 ' ' 1<br>contrast estimate SE df<br>t.ratio p.value<br>1 - 2 28.4761905 4.2771 60<br>6.658 <.0001<br>1 - 3 32.5714286 4.2771 60<br>7.615 <.0001<br>1 - 4 32.9523810 4.2771 60<br>7.704 <.0001<br>2 - 3 4.0952381 4.2771 60<br>0.957 0.7739 |

## Anesthesia and network dynamics during development

Chini et al.

2 - 4 -6.000000 3.280084  
54 -1.829 0.2711  
3 - 4 -11.105263 3.280084  
54 -3.386 0.0071

P value adjustment: tukey  
method for comparing a family  
of 4 estimates

### Figure 1D

#### Power full signal PFC

two-way anova  
Analysis of Variance of  
Aligned Rank Transformed  
Data

Table Type: Repeated  
Measures Analysis of  
Variance Table (Type I)  
Model: Repeated Measures  
(aov)  
Response: art(variable)

| Error                             | Df    | Df.res | F value | Pr(>F)                |
|-----------------------------------|-------|--------|---------|-----------------------|
| 1 cond                            | anm:c | 1      | 18      | 69.487 1.3576e-07 *** |
| 2 cond:freq                       | anm:: | 3      | 54      | 61.935 < 2.22e-16 *** |
| ---                               |       |        |         |                       |
| Signif. codes: 0 '***' 0.001      |       |        |         |                       |
| ***' 0.01 '**' 0.05 '.' 0.1 ' ' 1 |       |        |         |                       |

Bonferroni post-hoc  
comparison  
delta theta beta gamma  
3.051758e-05 1.525879e-05  
1.525879e-05 1.525879e-05

#### Power active periods PFC

two-way anova  
Analysis of Variance of  
Aligned Rank Transformed  
Data

Table Type: Repeated  
Measures Analysis of  
Variance Table (Type I)  
Model: Repeated Measures  
(aov)  
Response: art(variable)

| Error                             | Df    | Df.res | F value | Pr(>F)                |
|-----------------------------------|-------|--------|---------|-----------------------|
| 1 cond                            | anm:c | 1      | 18      | 22.274 0.00017099 *** |
| 2 cond:freq                       | anm:: | 3      | 54      | 13.800 8.5004e-07 *** |
| ---                               |       |        |         |                       |
| Signif. codes: 0 '***' 0.001      |       |        |         |                       |
| ***' 0.01 '**' 0.05 '.' 0.1 ' ' 1 |       |        |         |                       |

Bonferroni post-hoc  
comparison  
delta theta beta gamma  
2.471924e-02 9.650116e-01

2 - 4 -4.947368 3.912163  
54 -1.265 0.5891  
3 - 4 -9.684211 3.912163  
54 -2.475 0.0754

P value adjustment: tukey  
method for comparing a family  
of 4 estimates

### Figure 1D

#### Power full signal HP

two-way anova  
Analysis of Variance of  
Aligned Rank Transformed  
Data

Table Type: Repeated  
Measures Analysis of  
Variance Table (Type I)  
Model: Repeated Measures  
(aov)  
Response: art(variable)

| Error                             | Df    | Df.res | F value | Pr(>F)                |
|-----------------------------------|-------|--------|---------|-----------------------|
| 1 cond                            | anm:c | 1      | 18      | 46.382 2.2384e-06 *** |
| 2 cond:freq                       | anm:: | 3      | 54      | 48.874 2.0854e-15 *** |
| ---                               |       |        |         |                       |
| Signif. codes: 0 '***' 0.001      |       |        |         |                       |
| ***' 0.01 '**' 0.05 '.' 0.1 ' ' 1 |       |        |         |                       |

Bonferroni post-hoc  
comparison  
delta theta beta gamma  
1.525879e-05 1.525879e-05  
1.525879e-05 1.525879e-05

#### Power active periods HP

two-way anova  
Analysis of Variance of  
Aligned Rank Transformed  
Data

Table Type: Repeated  
Measures Analysis of  
Variance Table (Type I)  
Model: Repeated Measures  
(aov)  
Response: art(variable)

| Error                             | Df    | Df.res | F value | Pr(>F)               |
|-----------------------------------|-------|--------|---------|----------------------|
| 1 cond                            | anm:c | 1      | 18      | 13.4602 0.0017565 ** |
| 2 cond:freq                       | anm:: | 3      | 54      | 4.4602 0.0071739 **  |
| ---                               |       |        |         |                      |
| Signif. codes: 0 '***' 0.001      |       |        |         |                      |
| ***' 0.01 '**' 0.05 '.' 0.1 ' ' 1 |       |        |         |                      |

Bonferroni post-hoc  
comparison  
delta theta beta gamma  
9.012909e-01 7.232666e-02

2 - 4 -21.619048 3.86664  
60 -5.591 <.0001  
3 - 4 -24.476190 3.86664  
60 -6.330 <.0001

P value adjustment: tukey  
method for comparing a family  
of 4 estimates

### Figure 1D

#### Power full signal LEC

two-way anova  
Analysis of Variance of  
Aligned Rank Transformed  
Data

Table Type: Repeated  
Measures Analysis of  
Variance Table (Type I)  
Model: Repeated Measures  
(aov)  
Response: art(variable)

| Error                             | Df    | Df.res | F value | Pr(>F)                |
|-----------------------------------|-------|--------|---------|-----------------------|
| 1 cond                            | anm:c | 1      | 20      | 29.561 2.5383e-05 *** |
| 2 cond:freq                       | anm:: | 3      | 60      | 14.028 4.8921e-07 *** |
| ---                               |       |        |         |                       |
| Signif. codes: 0 '***' 0.001      |       |        |         |                       |
| ***' 0.01 '**' 0.05 '.' 0.1 ' ' 1 |       |        |         |                       |

Bonferroni post-hoc  
comparison  
delta theta beta gamma  
0.08628464 4.703522e-03  
3.814697e-06 0.0003356934

#### Power active periods LEC

two-way anova  
Analysis of Variance of  
Aligned Rank Transformed  
Data

Table Type: Repeated  
Measures Analysis of  
Variance Table (Type I)  
Model: Repeated Measures  
(aov)  
Response: art(variable)

| Error                             | Df    | Df.res | F value | Pr(>F)                |
|-----------------------------------|-------|--------|---------|-----------------------|
| 1 cond                            | anm:c | 1      | 20      | 17.512 0.00045669 *** |
| 2 cond:freq                       | anm:: | 3      | 60      | 11.020 7.3369e-06 *** |
| ---                               |       |        |         |                       |
| Signif. codes: 0 '***' 0.001      |       |        |         |                       |
| ***' 0.01 '**' 0.05 '.' 0.1 ' ' 1 |       |        |         |                       |

Bonferroni post-hoc  
comparison  
delta theta beta gamma  
1.00000000 1.907349e-05

2 - 4 4.4761905 4.2771 60  
1.047 0.7229  
3 - 4 0.3809524 4.2771 60  
0.089 0.9997

P value adjustment: tukey  
method for comparing a family  
of 4 estimates

### Figure 1D

#### Power full signal OB

two-way anova  
Analysis of Variance of  
Aligned Rank Transformed  
Data

Table Type: Repeated  
Measures Analysis of  
Variance Table (Type I)  
Model: Repeated Measures  
(aov)  
Response: art(variable)

| Error                             | Df    | Df.res | F value | Pr(>F)            |
|-----------------------------------|-------|--------|---------|-------------------|
| 1 cond                            | anm:c | 1      | 20      | 4.2525 0.052427 . |
| 2 cond:freq                       | anm:: | 3      | 60      | 3.6152 0.018139 * |
| ---                               |       |        |         |                   |
| Signif. codes: 0 '***' 0.001      |       |        |         |                   |
| ***' 0.01 '**' 0.05 '.' 0.1 ' ' 1 |       |        |         |                   |

Bonferroni post-hoc  
comparison  
delta theta beta gamma  
1.00000000 2.883911e-03  
1.171112e-03 0.0171394348

#### Power active periods OB

two-way anova  
Analysis of Variance of  
Aligned Rank Transformed  
Data

Table Type: Repeated  
Measures Analysis of  
Variance Table (Type I)  
Model: Repeated Measures  
(aov)  
Response: art(variable)

| Error                             | Df    | Df.res | F value | Pr(>F)            |
|-----------------------------------|-------|--------|---------|-------------------|
| 1 cond                            | anm:c | 1      | 20      | 1.3282 0.262711   |
| 2 cond:freq                       | anm:: | 3      | 60      | 2.5393 0.064904 . |
| ---                               |       |        |         |                   |
| Signif. codes: 0 '***' 0.001      |       |        |         |                   |
| ***' 0.01 '**' 0.05 '.' 0.1 ' ' 1 |       |        |         |                   |

Bonferroni post-hoc  
comparison  
delta theta beta gamma  
0.11605835 9.713669e-01

Anesthesia and network dynamics during development

Chini et al.

1.000000e+00 2.857971e-02 4.943848e-02 6.256104e-01 4.703522e-03 0.0862846375 2.840424e-02 0.0862846375

Figure 1E

Log firing rate full signal PFC

one-way anova  
Analysis of Variance of  
Aligned Rank Transformed  
Data

Table Type: Repeated  
Measures Analysis of  
Variance Table (Type I)  
Model: Repeated Measures  
(aov)  
Response: art(variable)

Error Df Df.res F value  
Pr(>F)  
1 time anm:t 3 54 27.752  
5.3925e-11 \*\*\*

---  
Signif. codes: 0 '\*\*\*' 0.001  
'\*\*' 0.01 '\*' 0.05 '.' 0.1 ' ' 1  
contrast estimate SE df  
t.ratio p.value  
1 - 2 18.3684211 2.347886  
54 7.823 <.0001  
1 - 3 18.5263158 2.347886  
54 7.891 <.0001  
1 - 4 14.1578947 2.347886  
54 6.030 <.0001  
2 - 3 0.1578947 2.347886  
54 0.067 0.9999  
2 - 4 -4.2105263 2.347886  
54 -1.793 0.2877  
3 - 4 -4.3684211 2.347886  
54 -1.861 0.2571

P value adjustment: tukey  
method for comparing a family  
of 4 estimates

Log firing rate active periods PFC

one-way anova  
Analysis of Variance of  
Aligned Rank Transformed  
Data

Table Type: Repeated  
Measures Analysis of  
Variance Table (Type I)  
Model: Repeated Measures  
(aov)  
Response: art(variable)

Error Df Df.res F value  
Pr(>F)  
1 time anm:t 3 54 4.7319  
0.0052906 \*\*

---  
Signif. codes: 0 '\*\*\*' 0.001  
'\*\*' 0.01 '\*' 0.05 '.' 0.1 ' ' 1  
contrast estimate SE df  
t.ratio p.value  
1 - 2 7.3684211 2.394314

Figure 1E

Log firing rate full signal HP

one-way anova  
Analysis of Variance of  
Aligned Rank Transformed  
Data

Table Type: Repeated  
Measures Analysis of  
Variance Table (Type I)  
Model: Repeated Measures  
(aov)  
Response: art(variable)

Error Df Df.res F value  
Pr(>F)  
1 time anm:t 3 54 13.869  
8.0251e-07 \*\*\*

---  
Signif. codes: 0 '\*\*\*' 0.001  
'\*\*' 0.01 '\*' 0.05 '.' 0.1 ' ' 1  
contrast estimate SE df  
t.ratio p.value  
1 - 2 9.3684211 1.71104  
54 5.475 <.0001  
1 - 3 9.7105263 1.71104  
54 5.675 <.0001  
1 - 4 5.8684211 1.71104  
54 3.430 0.0062  
2 - 3 0.3421053 1.71104  
54 0.200 0.9971  
2 - 4 -3.5000000 1.71104  
54 -2.046 0.1844  
3 - 4 -3.8421053 1.71104  
54 -2.245 0.1241

P value adjustment: tukey  
method for comparing a family  
of 4 estimates

Log firing rate active periods HP

one-way anova  
Analysis of Variance of  
Aligned Rank Transformed  
Data

Table Type: Repeated  
Measures Analysis of  
Variance Table (Type I)  
Model: Repeated Measures  
(aov)  
Response: art(variable)

Error Df Df.res F value  
Pr(>F)  
1 time anm:t 3 54 1.9002  
0.14053

---  
Signif. codes: 0 '\*\*\*' 0.001  
'\*\*' 0.01 '\*' 0.05 '.' 0.1 ' ' 1  
contrast estimate SE df  
t.ratio p.value  
1 - 2 2.052632 1.936114 54

Figure 1E

Log firing rate full signal LEC

one-way anova  
Analysis of Variance of  
Aligned Rank Transformed  
Data

Table Type: Repeated  
Measures Analysis of  
Variance Table (Type I)  
Model: Repeated Measures  
(aov)  
Response: art(variable)

Error Df Df.res F value  
Pr(>F)  
1 time anm:t 3 60 12.998  
1.204e-06 \*\*\*

---  
Signif. codes: 0 '\*\*\*' 0.001  
'\*\*' 0.01 '\*' 0.05 '.' 0.1 ' ' 1  
contrast estimate SE df  
t.ratio p.value  
1 - 2 1.123810e+01  
2.139859 60 5.252 <.0001  
1 - 3 1.123810e+01  
2.139859 60 5.252 <.0001  
1 - 4 1.009524e+01  
2.139859 60 4.718 0.0001  
2 - 3 1.421085e-14  
2.139859 60 0.000 1.0000  
2 - 4 -1.142857e+00  
2.139859 60 -0.534 0.9504  
3 - 4 -1.142857e+00  
2.139859 60 -0.534 0.9504

P value adjustment: tukey  
method for comparing a family  
of 4 estimates

Log firing rate active periods LEC

one-way anova  
Analysis of Variance of  
Aligned Rank Transformed  
Data

Table Type: Repeated  
Measures Analysis of  
Variance Table (Type I)  
Model: Repeated Measures  
(aov)  
Response: art(variable)

Error Df Df.res F value  
Pr(>F)  
1 time anm:t 3 60 11.826  
3.4682e-06 \*\*\*

---  
Signif. codes: 0 '\*\*\*' 0.001  
'\*\*' 0.01 '\*' 0.05 '.' 0.1 ' ' 1  
contrast estimate SE df  
t.ratio p.value  
1 - 2 -3.761905 2.429108

Figure 1E

Log firing rate full signal OB

one-way anova  
Analysis of Variance of  
Aligned Rank Transformed  
Data

Table Type: Repeated  
Measures Analysis of  
Variance Table (Type I)  
Model: Repeated Measures  
(aov)  
Response: art(variable)

Error Df Df.res F value  
Pr(>F)  
1 time anm:t 3 60 5.1927  
0.0029577 \*\*

---  
Signif. codes: 0 '\*\*\*' 0.001  
'\*\*' 0.01 '\*' 0.05 '.' 0.1 ' ' 1  
contrast estimate SE df  
t.ratio p.value  
1 - 2 6.3333333 2.434027  
60 2.602 0.0551  
1 - 3 9.4047619 2.434027  
60 3.864 0.0015  
1 - 4 5.6904762 2.434027  
60 2.338 0.1009  
2 - 3 3.0714286 2.434027  
60 1.262 0.5905  
2 - 4 -0.6428571 2.434027  
60 -0.264 0.9935  
3 - 4 -3.7142857 2.434027  
60 -1.526 0.4286

P value adjustment: tukey  
method for comparing a family  
of 4 estimates

Log firing rate active periods OB

one-way anova  
Analysis of Variance of  
Aligned Rank Transformed  
Data

Table Type: Repeated  
Measures Analysis of  
Variance Table (Type I)  
Model: Repeated Measures  
(aov)  
Response: art(variable)

Error Df Df.res F value  
Pr(>F)  
1 time anm:t 3 60 1.0235  
0.38868

---  
Signif. codes: 0 '\*\*\*' 0.001  
'\*\*' 0.01 '\*' 0.05 '.' 0.1 ' ' 1  
contrast estimate SE df  
t.ratio p.value  
1 - 2 -3.2380952 2.486221

## Anesthesia and network dynamics during development

*Chini et al.*

|       |            |          |       |          |          |        |        |           |          |        |            |          |
|-------|------------|----------|-------|----------|----------|--------|--------|-----------|----------|--------|------------|----------|
| 54    | 3.077      | 0.0168   | 1.060 | 0.7149   | 60       | -1.549 | 0.4155 | 60        | -1.302   | 0.5650 |            |          |
| 1 - 3 | 7.7368421  | 2.394314 | 1 - 3 | 3.368421 | 1.936114 | 54     | 1 - 3  | -4.761905 | 2.429108 | 1 - 3  | -2.4285714 | 2.486221 |
| 54    | 3.231      | 0.0110   | 1.740 | 0.3136   | 60       | -1.960 | 0.2145 | 60        | -0.977   | 0.7631 |            |          |
| 1 - 4 | 6.8947368  | 2.394314 | 1 - 4 | 4.368421 | 1.936114 | 54     | 1 - 4  | 8.238095  | 2.429108 | 1 - 4  | -4.1428571 | 2.486221 |
| 54    | 2.880      | 0.0283   | 2.256 | 0.1214   | 60       | 3.391  | 0.0066 | 60        | -1.666   | 0.3503 |            |          |
| 2 - 3 | 0.3684211  | 2.394314 | 2 - 3 | 1.315789 | 1.936114 | 54     | 2 - 3  | -1.000000 | 2.429108 | 2 - 3  | 0.8095238  | 2.486221 |
| 54    | 0.154      | 0.9987   | 0.680 | 0.9044   | 60       | -0.412 | 0.9763 | 60        | 0.326    | 0.9880 |            |          |
| 2 - 4 | -0.4736842 | 2.394314 | 2 - 4 | 2.315789 | 1.936114 | 54     | 2 - 4  | 12.000000 | 2.429108 | 2 - 4  | -0.9047619 | 2.486221 |
| 54    | -0.198     | 0.9972   | 1.196 | 0.6319   | 60       | 4.940  | <.0001 | 60        | -0.364   | 0.9834 |            |          |
| 3 - 4 | -0.8421053 | 2.394314 | 3 - 4 | 1.000000 | 1.936114 | 54     | 3 - 4  | 13.000000 | 2.429108 | 3 - 4  | -1.7142857 | 2.486221 |
| 54    | -0.352     | 0.9849   | 0.516 | 0.9548   | 60       | 5.352  | <.0001 | 60        | -0.690   | 0.9007 |            |          |

P value adjustment: tukey method for comparing a family of 4 estimates

P value adjustment: tukey method for comparing a family of 4 estimates

P value adjustment: tukey method for comparing a family of 4 estimates

P value adjustment: tukey method for comparing a family of 4 estimates

### Figure 2B

#### Active periods PFC

one-way anova  
Analysis of Variance of  
Aligned Rank Transformed  
Data

Table Type: Repeated  
Measures Analysis of  
Variance Table (Type I)  
Model: Repeated Measures  
(aov)  
Response: art(variable)

| Error        | Df | Df.res | F value | Pr(>F)         |
|--------------|----|--------|---------|----------------|
| 1 time anm:t | 3  | 48     | 52.546  | 3.3847e-15 *** |

---  
Signif. codes: 0 '\*\*\*' 0.001  
'\*\*' 0.01 '\*' 0.05 '.' 0.1 ' ' 1  
contrast estimate SE df  
t.ratio p.value  
1 - 2 10.41176 2.962703 48  
3.514 0.0052  
1 - 3 21.29412 2.962703 48  
7.187 <.0001  
1 - 4 35.47059 2.962703 48  
11.972 <.0001  
2 - 3 10.88235 2.962703 48  
3.673 0.0033  
2 - 4 25.05882 2.962703 48  
8.458 <.0001  
3 - 4 14.17647 2.962703 48  
4.785 0.0001

P value adjustment: tukey method for comparing a family of 4 estimates

### Figure 2D

#### Power full signal PFC

two-way anova  
Analysis of Variance of  
Aligned Rank Transformed  
Data

Table Type: Repeated  
Measures Analysis of  
Variance Table (Type I)

### Figure 2B

#### Active periods HP

one-way anova  
Analysis of Variance of  
Aligned Rank Transformed  
Data

Table Type: Repeated Measures Analysis of Variance Table  
(Type I)  
Model: Repeated Measures  
(aov)  
Response: art(variable)

| Error        | Df | Df.res | F value | Pr(>F)         |
|--------------|----|--------|---------|----------------|
| 1 time anm:t | 3  | 48     | 59.575  | 3.2938e-16 *** |

---  
Signif. codes: 0 '\*\*\*' 0.001  
'\*\*' 0.01 '\*' 0.05 '.' 0.1 ' ' 1  
contrast estimate SE df  
t.ratio p.value  
1 - 2 11.235294 2.538526  
48 4.426 0.0003  
1 - 3 23.382353 2.538526  
48 9.211 <.0001  
1 - 4 31.617647 2.538526  
48 12.455 <.0001  
2 - 3 12.147059 2.538526  
48 4.785 0.0001  
2 - 4 20.382353 2.538526  
48 8.029 <.0001  
3 - 4 8.235294 2.538526  
48 3.244 0.0112

P value adjustment: tukey method for comparing a family of 4 estimate

### Figure 2D

#### Power full signal HP

two-way anova  
Analysis of Variance of  
Aligned Rank Transformed  
Data

Table Type: Repeated Measures Analysis of Variance Table  
(Type I)



Anesthesia and network dynamics during development

Chini et al.

Model: Repeated Measures  
(aov)  
Response: art(variable)

| Error       | Df    | Df.res | F value               |
|-------------|-------|--------|-----------------------|
| Pr(>F)      |       |        |                       |
| 1 cond      | anm:c | 1 16   |                       |
|             |       |        | 34.631 2.3047e-05 *** |
| 2 cond:freq | anm:: | 3 48   |                       |
|             |       |        | 13.074 2.2956e-06 *** |

---  
Signif. codes: 0 '\*\*\*' 0.001  
'\*\*' 0.01 '\*' 0.05 '.' 0.1 ' ' 1

Bonferroni post-hoc  
comparison  
delta theta beta gamma  
0.01538086 0.05145264  
0.0033569336 0.0001220703

**Power active periods PFC**

two-way anova  
Analysis of Variance of  
Aligned Rank Transformed  
Data

Table Type: Repeated  
Measures Analysis of  
Variance Table (Type I)  
Model: Repeated Measures  
(aov)  
Response: art(variable)

| Error       | Df    | Df.res | F value               |
|-------------|-------|--------|-----------------------|
| Pr(>F)      |       |        |                       |
| 1 cond      | anm:c | 1 16   |                       |
|             |       |        | 19.642 0.00041858 *** |
| 2 cond:freq | anm:: | 3 48   |                       |
|             |       |        | 13.957 1.1375e-06 *** |

---  
Signif. codes: 0 '\*\*\*' 0.001  
'\*\*' 0.01 '\*' 0.05 '.' 0.1 ' ' 1

Bonferroni post-hoc  
comparison  
delta theta beta gamma  
0.28564453 0.35461426  
1.0000000000 1.0000000000

**Figure 2E**

**Log firing rate full signal PFC**

one-way anova  
Analysis of Variance of  
Aligned Rank Transformed  
Data

Table Type: Repeated  
Measures Analysis of  
Variance Table (Type I)  
Model: Repeated Measures  
(aov)  
Response: art(variable)

| Error  | Df | Df.res | F value |
|--------|----|--------|---------|
| Pr(>F) |    |        |         |

Model: Repeated Measures  
(aov)  
Response: art(variable)

| Error       | Df    | Df.res | F value               |
|-------------|-------|--------|-----------------------|
| Pr(>F)      |       |        |                       |
| 1 cond      | anm:c | 1 16   |                       |
|             |       |        | 21.758 0.00025899 *** |
| 2 cond:freq | anm:: | 3 48   |                       |
|             |       |        | 17.300 9.4437e-08 *** |

---  
Signif. codes: 0 '\*\*\*' 0.001  
'\*\*' 0.01 '\*' 0.05 '.' 0.1 ' ' 1

Bonferroni post-hoc  
comparison  
delta theta beta gamma  
0.31872559 0.04394531  
0.0006103516 0.0003051758

**Power active periods HP**

two-way anova  
Analysis of Variance of  
Aligned Rank Transformed  
Data

Table Type: Repeated Measures Analysis of Variance Table  
(Type I)  
Model: Repeated Measures  
(aov)  
Response: art(variable)

| Error       | Df    | Df.res | F value             |
|-------------|-------|--------|---------------------|
| Pr(>F)      |       |        |                     |
| 1 cond      | anm:c | 1 16   |                     |
|             |       |        | 2.8510 0.1107108    |
| 2 cond:freq | anm:: | 3 48   |                     |
|             |       |        | 5.6962 0.0020285 ** |

---  
Signif. codes: 0 '\*\*\*' 0.001  
'\*\*' 0.01 '\*' 0.05 '.' 0.1 ' ' 1

Bonferroni post-hoc  
comparison  
delta theta beta gamma  
0.12207031 1.00000000  
1.0000000000 0.4355468750

**Figure 2E**

**Log firing rate full signal HP**

one-way anova  
Analysis of Variance of  
Aligned Rank Transformed  
Data

Table Type: Repeated Measures Analysis of Variance Table  
(Type I)  
Model: Repeated Measures  
(aov)  
Response: art(variable)

| Error  | Df | Df.res | F value |
|--------|----|--------|---------|
| Pr(>F) |    |        |         |

## Anesthesia and network dynamics during development

Chini et al.

1 time anm:t 3 48 5.0897  
0.0038626 \*\*

---

Signif. codes: 0 '\*\*\*\*' 0.001  
'\*\*\*' 0.01 '\*\*' 0.05 '.' 0.1 ' ' 1

| contrast | estimate  | SE       | df | t.ratio | p.value |
|----------|-----------|----------|----|---------|---------|
| 1 - 2    | 2.735294  | 3.186585 | 48 | 0.858   | 0.8261  |
| 1 - 3    | 10.441176 | 3.186585 | 48 | 3.277   | 0.0102  |
| 1 - 4    | 9.411765  | 3.186585 | 48 | 2.954   | 0.0242  |
| 2 - 3    | 7.705882  | 3.186585 | 48 | 2.418   | 0.0872  |
| 2 - 4    | 6.676471  | 3.186585 | 48 | 2.095   | 0.1693  |
| 3 - 4    | -1.029412 | 3.186585 | 48 | -0.323  | 0.9882  |

P value adjustment: tukey  
method for comparing a family  
of 4 estimates

### Log firing rate active periods PFC

one-way anova  
Analysis of Variance of  
Aligned Rank Transformed  
Data

Table Type: Repeated  
Measures Analysis of  
Variance Table (Type I)  
Model: Repeated Measures  
(aov)  
Response: art(variable)

| Error        | Df | Df.res | F value | Pr(>F)         |
|--------------|----|--------|---------|----------------|
| 1 time anm:t | 3  | 48     | 11.305  | 9.9724e-06 *** |

---

Signif. codes: 0 '\*\*\*\*' 0.001  
'\*\*\*' 0.01 '\*\*' 0.05 '.' 0.1 ' ' 1

| contrast | estimate   | SE      | df | t.ratio | p.value |
|----------|------------|---------|----|---------|---------|
| 1 - 2    | -4.000000  | 3.69339 | 48 | -1.083  | 0.7015  |
| 1 - 3    | -7.588235  | 3.69339 | 48 | -2.055  | 0.1829  |
| 1 - 4    | -20.294118 | 3.69339 | 48 | -5.495  | <.0001  |
| 2 - 3    | -3.588235  | 3.69339 | 48 | -0.972  | 0.7662  |
| 2 - 4    | -16.294118 | 3.69339 | 48 | -4.412  | 0.0003  |
| 3 - 4    | -12.705882 | 3.69339 | 48 | -3.440  | 0.0064  |

P value adjustment: tukey  
method for comparing a family  
of 4 estimates

### Figure S1A

#### Imaginary coherence PFC- HP

two-way anova

1 time anm:t 3 48 21.092  
7.4021e-09 \*\*\*

---

Signif. codes: 0 '\*\*\*\*' 0.001  
'\*\*\*' 0.01 '\*\*' 0.05 '.' 0.1 ' ' 1

| contrast | estimate  | SE       | df | t.ratio | p.value |
|----------|-----------|----------|----|---------|---------|
| 1 - 2    | 4.911765  | 3.228287 | 48 | 1.521   | 0.4329  |
| 1 - 3    | 14.352941 | 3.228287 | 48 | 4.446   | 0.0003  |
| 1 - 4    | 23.676471 | 3.228287 | 48 | 7.334   | <.0001  |
| 2 - 3    | 9.441176  | 3.228287 | 48 | 2.925   | 0.0261  |
| 2 - 4    | 18.764706 | 3.228287 | 48 | 5.813   | <.0001  |
| 3 - 4    | 9.323529  | 3.228287 | 48 | 2.888   | 0.0286  |

P value adjustment: tukey method for comparing a family of 4  
estimates

### Log firing rate active periods HP

one-way anova  
Analysis of Variance of  
Aligned Rank Transformed  
Data

Table Type: Repeated Measures Analysis of Variance Table  
(Type I)  
Model: Repeated Measures  
(aov)  
Response: art(variable)

| Error        | Df | Df.res | F value | Pr(>F)     |
|--------------|----|--------|---------|------------|
| 1 time anm:t | 3  | 48     | 2.6759  | 0.057595 . |

---

Signif. codes: 0 '\*\*\*\*' 0.001  
'\*\*\*' 0.01 '\*\*' 0.05 '.' 0.1 ' ' 1

| contrast | estimate   | SE      | df | t.ratio | p.value |
|----------|------------|---------|----|---------|---------|
| 1 - 2    | -0.8235294 | 3.42545 | 48 | -0.240  | 0.9950  |
| 1 - 3    | -6.4705882 | 3.42545 | 48 | -1.889  | 0.2463  |
| 1 - 4    | -7.8823529 | 3.42545 | 48 | -2.301  | 0.1120  |
| 2 - 3    | -5.6470588 | 3.42545 | 48 | -1.649  | 0.3619  |
| 2 - 4    | -7.0588235 | 3.42545 | 48 | -2.061  | 0.1807  |
| 3 - 4    | -1.4117647 | 3.42545 | 48 | -0.412  | 0.9761  |

P value adjustment: tukey method for comparing a family of 4  
estimates

### Figure S1A

#### Imaginary coherence LEC- OB

two-way anova

## Anesthesia and network dynamics during development

Chini et al.

Analysis of Variance of  
Aligned Rank Transformed  
Data

Table Type: Repeated Measures Analysis of Variance Table  
(Type I)

Model: Repeated Measures  
(aov)

Response: art(variable)

|             | Error | Df | Df.res | F        | Pr(>F)  |
|-------------|-------|----|--------|----------|---------|
| 1 cond      | anm:c | 1  | 18     | 0.274684 | 0.60660 |
| 2 cond:freq | anm:: | 3  | 54     | 0.098025 | 0.96078 |

---  
Signif. codes: 0 '\*\*\*' 0.001  
'\*\*' 0.01 '\*' 0.05 '.' 0.1 ' ' 1

two-way anova

Bonferroni post-hoc  
comparison

|              | delta        | theta        | beta         | gamma        |
|--------------|--------------|--------------|--------------|--------------|
| 1.000000e+00 | 1.000000e+00 | 1.000000e+00 | 1.000000e+00 | 1.000000e+00 |
| 1.000000e+00 | 1.000000e+00 | 1.000000e+00 | 1.000000e+00 | 1.000000e+00 |

### Figure S1C

#### PPC PFC

two-way anova  
Analysis of Variance of  
Aligned Rank Transformed  
Data

Table Type: Repeated  
Measures Analysis of  
Variance Table (Type I)  
Model: Repeated Measures  
(aov)  
Response: art(variable)

|             | Error | Df | Df.res | F      | Pr(>F)   |
|-------------|-------|----|--------|--------|----------|
| 1 cond      | anm:c | 1  | 18     | 2.5610 | 0.126930 |
| 2 cond:freq | anm:: | 3  | 54     | 2.3506 | 0.082532 |

---  
Signif. codes: 0 '\*\*\*' 0.001  
'\*\*' 0.01 '\*' 0.05 '.' 0.1 ' ' 1

Bonferroni post-hoc  
comparison  
delta theta beta gamma  
1.000000e+00 6.751709e-01  
1.000000e+00 1.000000e+00

### Figure S1D

#### 1/f slope PFC

one-way anova  
Analysis of Variance of  
Aligned Rank Transformed  
Data

Analysis of Variance of  
Aligned Rank Transformed  
Data

Table Type: Repeated Measures Analysis of Variance Table  
(Type I)

Model: Repeated Measures  
(aov)

Response: art(variable)

|             | Error | Df | Df.res | F       | Pr(>F)   |
|-------------|-------|----|--------|---------|----------|
| 1 cond      | anm:c | 1  | 20     | 0.55076 | 0.466636 |
| 2 cond:freq | anm:: | 3  | 60     | 2.20480 | 0.096781 |

---  
Signif. codes: 0 '\*\*\*' 0.001  
'\*\*' 0.01 '\*' 0.05 '.' 0.1 ' ' 1

two-way anova

Bonferroni post-hoc  
comparison

|            | delta        | theta        | beta         | gamma        |
|------------|--------------|--------------|--------------|--------------|
| 0.81166840 | 1.000000e+00 | 1.000000e+00 | 1.000000e+00 | 0.9159431458 |

### Figure S1C

#### PPC LEC

two-way anova  
Analysis of Variance of  
Aligned Rank Transformed  
Data

Table Type: Repeated  
Measures Analysis of  
Variance Table (Type I)  
Model: Repeated Measures  
(aov)  
Response: art(variable)

|             | Error | Df | Df.res | F      | Pr(>F)     |
|-------------|-------|----|--------|--------|------------|
| 1 cond      | anm:c | 1  | 20     | 2.2892 | 0.145922   |
| 2 cond:freq | anm:: | 3  | 60     | 2.8296 | 0.045918 * |

---  
Signif. codes: 0 '\*\*\*' 0.001  
'\*\*' 0.01 '\*' 0.05 '.' 0.1 ' ' 1

Bonferroni post-hoc  
comparison  
delta theta beta gamma  
0.23802948 1.000000e+00  
1.000000e+00 1.0000000000

### Figure S1D

#### 1/f slope LEC

one-way anova  
Analysis of Variance of  
Aligned Rank Transformed  
Data

### Figure S1C

#### PPC OB

two-way anova  
Analysis of Variance of  
Aligned Rank Transformed  
Data

Table Type: Repeated  
Measures Analysis of  
Variance Table (Type I)  
Model: Repeated Measures  
(aov)  
Response: art(ppcOB)

|                         | Error     | Df | Df.res | F       | Pr(>F) |
|-------------------------|-----------|----|--------|---------|--------|
| 1 cond_ppcOB            | an_OB:_OB | 1  | 11     | 1.70329 | 0.2185 |
| 2 cond_ppcOB:freq_ppcOB | a_OB:_OB  | 3  | 33     | 0.49268 | 0.6898 |

---  
Signif. codes: 0 '\*\*\*' 0.001  
'\*\*' 0.01 '\*' 0.05 '.' 0.1 ' ' 1

Bonferroni post-hoc  
comparison  
delta theta beta gamma  
1.00000000 1.000000e+00  
1.000000e+00 0.1367187500

### Figure S1D

#### 1/f slope OB

one-way anova  
Analysis of Variance of  
Aligned Rank Transformed  
Data

## Anesthesia and network dynamics during development

Chini et al.

Table Type: Repeated Measures Analysis of Variance Table (Type I)  
Model: Repeated Measures (aov)  
Response: art(variable)

| Error        | Df | Df.res | F value | Pr(>F)  |
|--------------|----|--------|---------|---------|
| 1 time anm:t | 3  | 54     | 0.18187 | 0.90826 |

Signif. codes: 0 '\*\*\*\*' 0.001  
'\*\*\*' 0.01 '\*\*' 0.05 '.' 0.1 ' ' 1

| contrast | estimate   | SE       | df | t.ratio | p.value |
|----------|------------|----------|----|---------|---------|
| 1 - 2    | -3.0000000 | 7.083249 | 54 | -0.424  | 0.9742  |
| 1 - 3    | -5.1578947 | 7.083249 | 54 | -0.728  | 0.8854  |
| 1 - 4    | -3.3157895 | 7.083249 | 54 | -0.468  | 0.9657  |
| 2 - 3    | -2.1578947 | 7.083249 | 54 | -0.305  | 0.9901  |
| 2 - 4    | -0.3157895 | 7.083249 | 54 | -0.045  | 1.0000  |
| 3 - 4    | 1.8421053  | 7.083249 | 54 | 0.260   | 0.9938  |

P value adjustment: tukey method for comparing a family of 4 estimates

### Figure S1F

#### Sample entropy PFC

two-way anova  
Analysis of Variance of Aligned Rank Transformed Data

Table Type: Repeated Measures Analysis of Variance Table (Type I)  
Model: Repeated Measures (aov)  
Response: art(variable)

| Error             | Df | Df.res | F value  | Pr(>F)  |
|-------------------|----|--------|----------|---------|
| 1 cond anm:c      | 1  | 18     | 0.043354 | 0.83740 |
| 2 cond:freq anm:: | 3  | 54     | 0.721699 | 0.54341 |

Signif. codes: 0 '\*\*\*\*' 0.001  
'\*\*\*' 0.01 '\*\*' 0.05 '.' 0.1 ' ' 1

Bonferroni post-hoc comparison  
delta theta beta gamma  
1.000000e+00 1.000000e+00  
1.000000e+00 1.000000e+00

Table Type: Repeated Measures Analysis of Variance Table (Type I)  
Model: Repeated Measures (aov)  
Response: art(variable)

| Error        | Df | Df.res | F value | Pr(>F)  |
|--------------|----|--------|---------|---------|
| 1 time anm:t | 3  | 54     | 0.59431 | 0.62144 |

Signif. codes: 0 '\*\*\*\*' 0.001  
'\*\*\*' 0.01 '\*\*' 0.05 '.' 0.1 ' ' 1

| contrast | estimate  | SE       | df | t.ratio | p.value |
|----------|-----------|----------|----|---------|---------|
| 1 - 2    | 3.6842117 | 7.330003 | 54 | 0.503   | 0.9581  |
| 1 - 3    | 9.263158  | 7.330003 | 54 | 1.264   | 0.5897  |
| 1 - 4    | 1.8947377 | 7.330003 | 54 | 0.258   | 0.9939  |
| 2 - 3    | 5.578947  | 7.330003 | 54 | 0.761   | 0.8715  |
| 2 - 4    | -1.789474 | 7.330003 | 54 | -0.244  | 0.9948  |
| 3 - 4    | -7.368421 | 7.330003 | 54 | -1.005  | 0.7470  |

P value adjustment: tukey method for comparing a family of 4 estimates

### Figure S1F

#### Sample entropy HP

two-way anova  
Analysis of Variance of Aligned Rank Transformed Data

Table Type: Repeated Measures Analysis of Variance Table (Type I)  
Model: Repeated Measures (aov)  
Response: art(variable)

| Error             | Df | Df.res | F value  | Pr(>F)  |
|-------------------|----|--------|----------|---------|
| 1 cond anm:c      | 1  | 18     | 0.051911 | 0.82234 |
| 2 cond:freq anm:: | 3  | 54     | 1.105389 | 0.35498 |

Signif. codes: 0 '\*\*\*\*' 0.001  
'\*\*\*' 0.01 '\*\*' 0.05 '.' 0.1 ' ' 1

Bonferroni post-hoc comparison  
delta theta beta gamma  
1.000000e+00 5.787506e-01  
1.000000e+00 1.000000e+00

Table Type: Repeated Measures Analysis of Variance Table (Type I)  
Model: Repeated Measures (aov)  
Response: art(variable)

| Error        | Df | Df.res | F value | Pr(>F)  |
|--------------|----|--------|---------|---------|
| 1 time anm:t | 3  | 60     | 0.2308  | 0.87458 |

Signif. codes: 0 '\*\*\*\*' 0.001  
'\*\*\*' 0.01 '\*\*' 0.05 '.' 0.1 ' ' 1

| contrast | estimate   | SE       | df | t.ratio | p.value |
|----------|------------|----------|----|---------|---------|
| 1 - 2    | 3.8095238  | 6.694838 | 60 | 0.569   | 0.9409  |
| 1 - 3    | -1.3333333 | 6.694838 | 60 | -0.199  | 0.9972  |
| 1 - 4    | -0.4761905 | 6.694838 | 60 | -0.071  | 0.9999  |
| 2 - 3    | -5.1428571 | 6.694838 | 60 | -0.768  | 0.8685  |
| 2 - 4    | -4.2857143 | 6.694838 | 60 | -0.640  | 0.9186  |
| 3 - 4    | 0.8571429  | 6.694838 | 60 | 0.128   | 0.9992  |

P value adjustment: tukey method for comparing a family of 4 estimates

### Figure S1F

#### Sample entropy LEC

two-way anova  
Analysis of Variance of Aligned Rank Transformed Data

Table Type: Repeated Measures Analysis of Variance Table (Type I)  
Model: Repeated Measures (aov)  
Response: art(variable)

| Error             | Df | Df.res | F value | Pr(>F)  |
|-------------------|----|--------|---------|---------|
| 1 cond anm:c      | 1  | 20     | 0.4563  | 0.50709 |
| 2 cond:freq anm:: | 3  | 60     | 1.4887  | 0.22671 |

Signif. codes: 0 '\*\*\*\*' 0.001  
'\*\*\*' 0.01 '\*\*' 0.05 '.' 0.1 ' ' 1

Bonferroni post-hoc comparison  
delta theta beta gamma  
1.0000000 1.000000e+00  
1.000000e+00 1.000000000

Table Type: Repeated Measures Analysis of Variance Table (Type I)  
Model: Repeated Measures (aov)  
Response: art(variable)

| Error        | Df | Df.res | F value | Pr(>F)  |
|--------------|----|--------|---------|---------|
| 1 time anm:t | 3  | 60     | 0.3423  | 0.79481 |

Signif. codes: 0 '\*\*\*\*' 0.001  
'\*\*\*' 0.01 '\*\*' 0.05 '.' 0.1 ' ' 1

| contrast | estimate   | SE       | df | t.ratio | p.value |
|----------|------------|----------|----|---------|---------|
| 1 - 2    | -0.7142857 | 6.768396 | 60 | -0.106  | 0.9996  |
| 1 - 3    | -3.4761905 | 6.768396 | 60 | -0.514  | 0.9555  |
| 1 - 4    | 3.3333333  | 6.768396 | 60 | 0.492   | 0.9605  |
| 2 - 3    | -2.7619048 | 6.768396 | 60 | -0.408  | 0.9768  |
| 2 - 4    | 4.0476190  | 6.768396 | 60 | 0.598   | 0.9323  |
| 3 - 4    | 6.8095238  | 6.768396 | 60 | 1.006   | 0.7465  |

P value adjustment: tukey method for comparing a family of 4 estimates

### Figure S1F

#### entropy OB

two-way anova  
Analysis of Variance of Aligned Rank Transformed Data

Table Type: Repeated Measures Analysis of Variance Table (Type I)  
Model: Repeated Measures (aov)  
Response: art(variable)

| Error             | Df | Df.res | F value  | Pr(>F)  |
|-------------------|----|--------|----------|---------|
| 1 cond anm:c      | 1  | 20     | 0.092223 | 0.76451 |
| 2 cond:freq anm:: | 3  | 60     | 0.134148 | 0.93933 |

Signif. codes: 0 '\*\*\*\*' 0.001  
'\*\*\*' 0.01 '\*\*' 0.05 '.' 0.1 ' ' 1

Bonferroni post-hoc comparison  
delta theta beta gamma  
1.0000000 1.000000e+00  
1.000000e+00 1.000000000

**Figure S2C**

**Power full signal PFC**

two-way anova  
Analysis of Variance of  
Aligned Rank Transformed  
Data

Table Type: Repeated Measures Analysis of Variance Table  
(Type I)  
Model: Repeated Measures  
(aov)  
Response: art(variable)

|             | Error | Df | Df.res | F value | Pr(>F)         |
|-------------|-------|----|--------|---------|----------------|
| 1 cond      | anm:c | 1  | 9      | 28.661  | 0.00046016 *** |
| 2 cond:freq | anm:: | 3  | 27     | 12.890  | 2.0587e-05 *** |

---  
Signif. codes: 0 '\*\*\*' 0.001  
'\*\*' 0.01 '\*' 0.05 '.' 0.1 ' ' 1

Bonferroni post-hoc  
comparison  
delta theta beta gamma  
0.03710938 0.3222656  
0.001953125 0.001953125
